# Supplementary material for: Highly emissive planarizedB,N-diarylated benzonaphthoazaborine compounds for narrowband blue fluorescence
Source: Royal Society of Chemistry journal article supplement (doi:10.1039/d2ra05163j), 2022-01-01
Supplement: d2ra05163j1.pdf [file d2ra05163j1.pdf]

## Electronic Supplementary Information

### Highly emissive planarized *B,N*-diarylated benzonaphthoazaborine compounds for narrowband blue fluorescence

Ngoc Tuyet Nhi Nguyen,<sup>†</sup> Hanif Mubarak,<sup>†</sup> Taehwan Lee, Thi Quyen Tran, Jaehoon Jung\* and Min Hyung Lee\*

*Department of Chemistry, University of Ulsan, Ulsan 44610, Republic of Korea*

## General considerations

All operations were performed under an inert nitrogen atmosphere using standard Schlenk and glovebox techniques. Anhydrous grade solvents were used after drying over activated molecular sieves (5Å). Spectrophotometric-grade toluene was used for photophysical measurements. Commercial reagents were used without further purification after purchase. Deuterated solvents from Eurisotop were used. NMR spectra were recorded on a Bruker AM 300 (300.13 MHz for  $^1\text{H}$ , 75.47 MHz for  $^{13}\text{C}$ ) or a Bruker AVANCE III HD 400 (128.38 MHz for  $^{11}\text{B}$ ) spectrometer at ambient temperature. Chemical shifts (in ppm) are referenced against external  $\text{Me}_4\text{Si}$  ( $^1\text{H}$ ,  $^{13}\text{C}$ ) and  $\text{BF}_3\cdot\text{OEt}_2$  ( $^{11}\text{B}$ ). Mass spectra were obtained using a JEOL JMS700 high-resolution EI-mass spectrometer (HR EI-MS) at the Korea Basic Science Institute (KBSI), Daegu, Korea. Cyclic voltammetry experiments were carried out on a CHI600E system. The photophysical analysis was done by using an FS5 spectrophotometer (Edinburgh Instruments) and PLQY spectrophotometer (Quantaaurus-QY C11347-11, Hamamatsu Photonics) at total-period analysis center for Ulsan chemical industry of KBSI.

## Synthesis

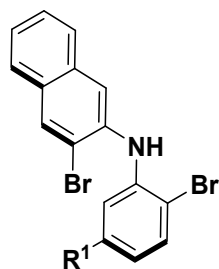

**1a**, R<sup>1</sup> = H

**4a**, R<sup>1</sup> = Me

**5a**, R<sup>1</sup> = <sup>t</sup>Bu

### 3-Bromo-*N*-(2-bromophenyl)naphthalen-2-amine (**1a**)

The mixture of 2,3-dibromonaphthalene (3.00 g, 10.50 mmol), 2-bromoaniline (1.20 g, 7.00 mmol), tris-(dibenzylideneacetone)dipalladium(0) ( $\text{Pd}_2(\text{dba})_3$ , 0.19 g, 0.21 mmol), bis[(2-diphenylphosphino)phenyl] ether (DPEPhos, 0.23 g, 0.42 mmol), and sodium *tert*-butoxide ( $\text{NaO}^t\text{Bu}$ , 1.00 g, 10.5 mmol) in dry toluene (30 mL) was heated at 80 °C for 12 h. After cooling down, the mixture was diluted with  $\text{CH}_2\text{Cl}_2$  (30 mL), filtered through celite pad, and concentrated under reduced pressure. The crude product was subjected to silica gel column chromatography using  $\text{CH}_2\text{Cl}_2$ /hexane (1:10, v/v) as an eluent to give **1a** as a white solid (yield: 1.40 g, 53%).  $^1\text{H}$  NMR ( $\text{CDCl}_3$ ):  $\delta$  8.13 (s, 1H), 7.69 (d,  $J$  = 8.4 Hz, 1H), 7.64–7.60 (m, 3H), 7.45 (ddd,  $J$  = 13.8, 8.2, 6.8 Hz, 2H), 7.36 (dd,  $J$  = 8.1, 1.2 Hz, 1H), 7.30 (dd,  $J$  =

7.3, 1.4 Hz, 1H), 6.92–6.86 (m, 1H), 6.62 (br, 1H). <sup>13</sup>C NMR (CDCl<sub>3</sub>): δ 140.1, 137.5, 133.4, 133.4, 132.2, 129.9, 128.3, 127.0, 126.8, 126.6, 124.7, 122.9, 118.6, 115.6, 114.7, 112.7.

### 3-Bromo-*N*-(2-bromo-5-methylphenyl)naphthalen-2-amine (4a)

This compound was prepared in a manner analogous to the synthesis of **1a** using Pd<sub>2</sub>(dba)<sub>3</sub> (0.23 g, 0.25 mmol), DPEPhos (0.27 g, 0.5 mmol), NaO<sup>t</sup>Bu (1.21 g, 12.58 mmol), 2,3-dibromonaphthalene (2.4 g, 8.39 mmol), and 2-bromo-5-methylaniline (1.04 g, 5.59 mmol) to give **4a** as a white powder (yield: 1.10 g, 51%). <sup>1</sup>H NMR (CDCl<sub>3</sub>): δ 8.13 (s, 1H), 7.69 (d, *J* = 8.0 Hz, 1H), 7.64 (d, *J* = 8.1 Hz, 1H), 7.60 (s, 1H), 7.49 (d, *J* = 8.1 Hz, 1H), 7.46–7.40 (m, 1H), 7.35 (m, 1H), 7.28 (d, *J* = 1.7 Hz, 1H), 6.72 (dd, *J* = 8.2, 1.9 Hz, 1H), 6.54 (br, 1H), 2.30 (s, 3H). <sup>13</sup>C NMR (CDCl<sub>3</sub>): δ 139.8, 138.5, 137.7, 133.4, 133.0, 132.2, 129.9, 126.9, 126.8, 126.6, 124.6, 124.1, 119.4, 115.6, 112.8, 111.6, 21.5.

### 3-Bromo-*N*-(2-bromo-5-(*tert*-butyl)phenyl)naphthalen-2-amine (5a)

This compound was prepared in a manner analogous to the synthesis of **1a** using Pd<sub>2</sub>(dba)<sub>3</sub> (0.09 g, 0.10 mmol), DPEPhos (0.11 g, 0.21 mmol), NaO<sup>t</sup>Bu (0.50 g, 5.25 mmol), 2,3-dibromonaphthalene (2.0 g, 7.0 mmol), and 2-bromo-5-(*tert*-butyl)aniline (0.79 g, 3.50 mmol) to give **5a** as a white powder (yield: 1.20 g, 79%). <sup>1</sup>H NMR (CDCl<sub>3</sub>): δ 8.13 (s, 1H), 7.68 (d, *J* = 8.1 Hz, 1H), 7.61–7.52 (m, 4H), 7.42 (ddd, *J* = 8.2, 6.9, 1.3 Hz, 1H), 7.33 (ddd, *J* = 8.0, 6.9, 1.2 Hz, 1H), 6.95 (dd, *J* = 8.4, 2.3 Hz, 1H), 6.60 (s, 1H), 1.31 (s, 9H). <sup>13</sup>C NMR (CDCl<sub>3</sub>): δ 151.8, 139.2, 138.0, 133.4, 132.8, 132.2, 129.6, 127.0, 126.8, 126.5, 124.4, 120.7, 117.1, 115.2, 112.1, 111.3, 34.9, 31.3.

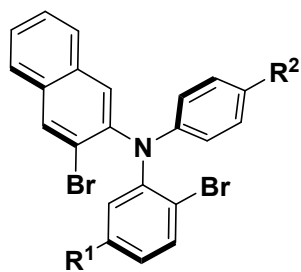

**1b**, R<sup>1</sup> = R<sup>2</sup> = H

**3b**, R<sup>1</sup> = H, R<sup>2</sup> = <sup>t</sup>Bu

**4b**, R<sup>1</sup> = Me, R<sup>2</sup> = <sup>t</sup>Bu

**5b**, R<sup>1</sup> = <sup>t</sup>Bu, R<sup>2</sup> = <sup>t</sup>Bu

### 3-Bromo-*N*-(2-bromophenyl)-*N*-phenylnaphthalen-2-amine (1b)

The mixture of **1a** (1.40 g, 3.71 mmol), iodobenzene (3.80 g, 18.60 mmol), copper iodide (0.35 g, 1.86 mmol), and potassium carbonate (1.50 g, 11.13 mmol) was refluxed at 200 °C for 24 h. After cooling to room temperature, CH<sub>2</sub>Cl<sub>2</sub> (30 mL) and water (50 mL) were added to the mixture. The organic layer

was separated and the aqueous layer was extracted with CH<sub>2</sub>Cl<sub>2</sub> three times (30 mL × 3). The combined organic layer was washed with brine, dried over MgSO<sub>4</sub>, and concentrated under reduced pressure. The crude product was purified by silica gel column chromatography using CH<sub>2</sub>Cl<sub>2</sub>/hexane (1:10, v/v) as an eluent to give **1b** as a white solid (yield: 1.45 g, 86%). <sup>1</sup>H NMR (CDCl<sub>3</sub>): δ 8.16 (s, 1H), 7.77–7.71 (m, 1H), 7.64 (d, *J* = 7.0 Hz, 2H), 7.52 (s, 1H), 7.45 (dd, *J* = 6.0, 3.2 Hz, 2H), 7.23 (dt, *J* = 19.4, 7.3 Hz, 4H), 7.07 (t, *J* = 7.5 Hz, 1H), 7.00 (t, *J* = 7.2 Hz, 1H), 6.78 (d, *J* = 7.9 Hz, 2H). <sup>13</sup>C NMR (CDCl<sub>3</sub>): δ 147.8, 146.2, 143.2, 134.8, 133.6, 133.2, 132.2, 129.5, 129.1, 128.5, 127.4, 127.1, 126.8, 126.7, 126.5, 126.4, 122.2, 122.0, 121.4, 121.3.

### **3-Bromo-*N*-(2-bromophenyl)-*N*-(4-(*tert*-butyl)phenyl)naphthalen-2-amine (3b)**

This compound was prepared in a manner analogous to the synthesis of **1b** using **1a** (2.0 g, 5.3 mmol), copper iodide (0.50 g, 2.65 mmol), potassium carbonate (2.19 g, 15.90 mmol), and 1-(*tert*-butyl)-4-iodobenzene (6.9 g, 26.52 mmol) to give **3b** as a white powder (yield: 1.90 g, 72%). <sup>1</sup>H NMR (CDCl<sub>3</sub>): δ 8.13 (s, 1H), 7.73 (dd, *J* = 6.0, 3.2 Hz, 1H), 7.64–7.59 (m, 2H), 7.46–7.40 (m, 3H), 7.22 (d, *J* = 8.5 Hz, 3H), 7.14 (dd, *J* = 8.0, 1.5 Hz, 1H), 7.07–7.01 (m, 1H), 6.71 (d, *J* = 8.7 Hz, 2H), 1.30 (s, 12H). <sup>13</sup>C NMR (CDCl<sub>3</sub>): δ 146.6, 145.3, 145.1, 143.6, 134.7, 133.5, 133.2, 132.0, 129.2, 128.4, 127.3, 126.8, 126.6, 126.2, 126.1, 125.9, 122.0, 122.0, 121.5, 121.4, 34.4, 31.6.

### **3-Bromo-*N*-(2-bromo-5-methylphenyl)-*N*-(4-(*tert*-butyl)phenyl)naphthalen-2-amine (4b)**

This compound was prepared in a manner analogous to the synthesis of **1b** using **4a** (1.1 g, 2.81 mmol), copper iodide (0.26 g, 1.40 mmol), potassium carbonate (1.16 g, 8.43 mmol), and 1-(*tert*-butyl)-4-iodobenzene (3.65 g, 14.06 mmol) to give **4b** as a white powder (yield: 0.90 g, 61%). <sup>1</sup>H NMR (CDCl<sub>3</sub>): δ 8.13 (s, 1H), 7.73 (dd, *J* = 6.2, 3.2 Hz, 1H), 7.63 (dd, *J* = 6.0, 3.4 Hz, 1H), 7.49–7.40 (m, 4H), 7.22 (d, *J* = 8.7 Hz, 2H), 6.94 (s, 1H), 6.86 (d, *J* = 8.1 Hz, 1H), 6.68 (d, *J* = 8.7 Hz, 2H), 2.23 (s, 3H), 1.30 (s, 9H). <sup>13</sup>C NMR (CDCl<sub>3</sub>): δ 146.0, 145.3, 144.8, 143.6, 138.5, 134.3, 133.5, 133.2, 132.0, 129.8, 127.3, 127.3, 126.8, 126.7, 126.6, 126.1, 125.9, 121.6, 121.1, 118.7, 34.3, 31.6, 21.1.

### **3-Bromo-*N*-(2-bromo-5-(*tert*-butyl)phenyl)-*N*-(4-(*tert*-butyl)phenyl)naphthalen-2-amine (5b)**

This compound was prepared in a manner analogous to the synthesis of **1b** using **5a** (1.2 g, 2.77 mmol), copper iodide (0.26 g, 1.38 mmol), potassium carbonate (1.15 g, 8.31 mmol), and 1-(*tert*-butyl)-4-iodobenzene (3.60 g, 13.85 mmol) to give **5b** as a white powder (yield: 1.20 g, 75%). <sup>1</sup>H NMR (CDCl<sub>3</sub>): δ 8.14 (s, 1H), 7.73 (dd, *J* = 5.8, 3.1 Hz, 1H), 7.64 (dd, *J* = 6.1, 3.1 Hz, 1H), 7.55–7.49 (m, 2H), 7.43 (dd, *J* = 5.8, 2.7 Hz, 2H), 7.21 (d, *J* = 9.2 Hz, 3H), 7.07 (d, *J* = 8.4 Hz, 1H), 6.66 (d, *J* = 8.2 Hz, 2H),

1.30 (s, 9H), 1.20 (s, 9H).  $^{13}\text{C}$  NMR ( $\text{CDCl}_3$ ):  $\delta$  152.0, 145.8, 145.2, 144.5, 143.4, 134.0, 133.5, 133.2, 132.0, 127.4, 126.8, 126.8, 126.7, 126.5, 126.1, 125.8, 123.6, 121.6, 120.6, 118.8, 34.7, 34.3, 31.6, 31.3.

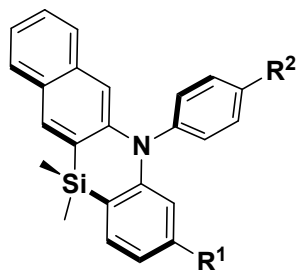

**1c**,  $\text{R}^1 = \text{R}^2 = \text{H}$

**3c**,  $\text{R}^1 = \text{H}$ ,  $\text{R}^2 = \text{tBu}$

**4c**,  $\text{R}^1 = \text{Me}$ ,  $\text{R}^2 = \text{tBu}$

**5c**,  $\text{R}^1 = \text{R}^2 = \text{tBu}$

### 12,12-Dimethyl-5-phenyl-5,12-dihydrobenzo[b]naphtho[2,3-e][1,4]azasiline (**1c**)

To a solution of **1b** (1.50 g, 3.31 mmol) in dry THF (30 mL) was added dropwise *n*-BuLi (2.5 M in hexane, 2.65 mL, 6.62 mmol) at  $-78$  °C. The mixture was stirred at  $-78$  °C for 1 h and then  $\text{Me}_2\text{SiCl}_2$  (0.43 g, 3.31 mmol) was slowly added. After stirring at room temperature overnight, the resulting white turbid mixture was quenched by saturated aqueous  $\text{NH}_4\text{Cl}$  solution (50 mL) and extracted with diethyl ether (30 mL  $\times$  3). The combined organic layer was dried over  $\text{MgSO}_4$ , filtered, and concentrated under reduced pressure. The crude product was purified by silica gel column chromatography using  $\text{CH}_2\text{Cl}_2$ /hexane (1:10, v/v) as an eluent to give **1c** as a white powder (yield: 0.97 g, 83%).  $^1\text{H}$  NMR ( $\text{CDCl}_3$ ):  $\delta$  8.10 (s, 1H), 7.78 (d,  $J = 7.8$  Hz, 1H), 7.70 (dd,  $J = 10.3, 4.7$  Hz, 2H), 7.63–7.54 (m, 2H), 7.43 (d,  $J = 8.0$  Hz, 1H), 7.39–7.35 (m, 2H), 7.33–7.24 (m, 2H), 7.16 (ddd,  $J = 8.8, 7.2, 1.8$  Hz, 1H), 6.99 (dt,  $J = 7.1, 3.6$  Hz, 1H), 6.62 (s, 1H), 6.38 (d,  $J = 8.6$  Hz, 1H), 0.62 (s, 6H).  $^{13}\text{C}$  NMR ( $\text{CDCl}_3$ ):  $\delta$  149.8, 146.9, 144.0, 135.3, 134.8, 134.4, 131.3, 131.2, 130.2, 128.1, 128.0, 127.3, 127.2, 126.7, 123.5, 122.8, 119.8, 119.0, 117.2, 112.1, 0.4.

### 5-(4-(*Tert*-butyl)phenyl)-12,12-dimethyl-5,12-dihydrobenzo[b]naphtho[2,3-e][1,4]azasiline (**3c**)

This compound was prepared in a manner analogous to the synthesis of **1c** using **3b** (1.94 g, 3.82 mmol) to give **3c** as a white powder (yield: 1.14 g, 73%).  $^1\text{H}$  NMR ( $\text{CDCl}_3$ ):  $\delta$  8.08 (s, 1H), 7.76 (dd,  $J = 8.0, 1.3$  Hz, 1H), 7.69–7.65 (m, 2H), 7.59 (dd,  $J = 7.1, 1.8$  Hz, 1H), 7.44 (d,  $J = 8.0$  Hz, 1H), 7.33–7.22 (m, 4H), 7.16 (ddd,  $J = 8.9, 7.2, 1.9$  Hz, 1H), 6.96 (t,  $J = 6.9$  Hz, 1H), 6.62 (s, 1H), 6.38 (d,  $J = 8.4$  Hz, 1H), 1.47 (s, 9H), 0.60 (s, 6H).  $^{13}\text{C}$  NMR ( $\text{CDCl}_3$ ):  $\delta$  151.1, 150.0, 147.1, 141.2, 135.2, 134.8, 134.3, 130.6, 130.2, 128.1, 128.0, 127.3, 127.2, 126.6, 123.4, 122.7, 119.6, 118.8, 117.1, 112.0, 35.0, 31.7, 0.5.

### 5-(4-(*Tert*-butyl)phenyl)-3,12,12-trimethyl-5,12-dihydrobenzo[*b*]naphtho[2,3-*e*][1,4]azasiline (4c)

This compound was prepared in a manner analogous to the synthesis of **1c** using **4b** (0.90 g, 1.72 mmol) to give **4c** as a white powder (yield: 0.54 g, 75%). <sup>1</sup>H NMR (CDCl<sub>3</sub>): δ 8.05 (s, 1H), 7.75 (d, *J* = 7.9 Hz, 1H), 7.68–7.63 (m, 2H), 7.48 (d, *J* = 7.3 Hz, 1H), 7.41 (d, *J* = 8.0 Hz, 1H), 7.30 (dd, *J* = 6.7, 1.3 Hz, 1H), 7.26–7.20 (m, 3H), 6.80 (d, *J* = 7.3 Hz, 1H), 6.56 (s, 1H), 6.19 (s, 1H), 2.17 (s, 3H), 1.47 (s, 9H), 0.57 (s, 6H). <sup>13</sup>C NMR (CDCl<sub>3</sub>): δ 151.0, 150.1, 147.2, 141.2, 140.2, 135.2, 134.8, 134.3, 130.5, 128.0, 127.9, 127.3, 127.2, 126.6, 123.3, 123.0, 120.8, 117.7, 115.5, 112.1, 35.0, 31.7, 22.3, 0.6.

### 3-(*Tert*-butyl)-5-(4-(*tert*-butyl)phenyl)-12,12-dimethyl-5,12-dihydrobenzo[*b*]naphtho[2,3-*e*][1,4]azasiline (5c)

This compound was prepared in a manner analogous to the synthesis of **1c** using **5b** (1.1 g, 1.95 mmol) to give **5c** as a white powder (yield: 0.75 g, 83%). <sup>1</sup>H NMR (CDCl<sub>3</sub>): δ 8.06 (s, 1H), 7.75 (d, *J* = 8.0 Hz, 1H), 7.69–7.64 (m, 2H), 7.51 (d, *J* = 7.6 Hz, 1H), 7.45 (d, *J* = 8.1 Hz, 1H), 7.33–7.26 (m, 2H), 7.26–7.20 (m, 2H), 6.99 (dd, *J* = 7.6, 1.6 Hz, 1H), 6.70 (s, 1H), 6.31 (d, *J* = 1.5 Hz, 1H), 1.46 (s, 9H), 1.09 (s, 9H), 0.57 (s, 6H). <sup>13</sup>C NMR (CDCl<sub>3</sub>): δ 153.1, 151.0, 150.1, 147.1, 141.4, 135.3, 134.9, 134.0, 130.5, 127.9, 127.9, 127.3, 127.2, 126.5, 123.2, 122.9, 117.0, 115.6, 114.6, 111.9, 35.0, 34.9, 31.6, 31.0, 0.6.

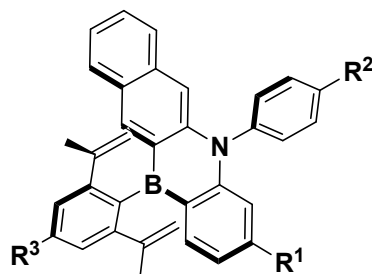

**1d**, R<sup>1</sup> = R<sup>2</sup> = R<sup>3</sup> = H

**2d**, R<sup>1</sup> = R<sup>2</sup> = H, R<sup>3</sup> = *t*Bu

**3d**, R<sup>1</sup> = H, R<sup>2</sup> = R<sup>3</sup> = *t*Bu

**4d**, R<sup>1</sup> = Me, R<sup>2</sup> = R<sup>3</sup> = *t*Bu

**5d**, R<sup>1</sup> = R<sup>2</sup> = R<sup>3</sup> = *t*Bu

### 12-(2,6-Di(prop-1-en-2-yl)phenyl)-5-phenyl-5,12-dihydrobenzo[*b*]naphtho[2,3-*e*][1,4]azaborinine (1d)

Boron tribromide (BBr<sub>3</sub>, 0.53 g, 2.10 mmol) was added carefully to the flask containing **1c** (0.25 g, 0.70 mmol) at room temperature. After stirring at 60 °C for 3 h, the volatiles were removed under reduced pressure at the same temperature for 2 h. The crude mixture was dissolved in anhydrous toluene (10 mL), into which a toluene solution of (2,6-di(prop-1-en-2-yl)phenyl)lithium was added at 0 °C. The

latter solution was prepared by the addition of *n*-BuLi (2.5 M in hexane, 0.4 mL, 1 mmol) into a toluene solution of 2-bromo-1,3-di(prop-1-en-2-yl)benzene (0.20 g, 0.84 mmol) at 0 °C. After stirring at room temperature for 12 h, the mixture was quenched with saturated NH<sub>4</sub>Cl solution and extracted with diethyl ether. The organic layer was dried over MgSO<sub>4</sub>, filtered, and concentrated under reduced pressure. The crude product was subjected to silica gel column chromatography using CH<sub>2</sub>Cl<sub>2</sub>/hexane (1:6, v/v) to give **1d** as a yellow solid (yield: 0.10 g, 40%). <sup>1</sup>H NMR (CD<sub>2</sub>Cl<sub>2</sub>): δ 8.47 (s, 1H), 7.84 (d, *J* = 7.7 Hz, 2H), 7.78 (t, *J* = 7.3 Hz, 2H), 7.72–7.66 (m, 1H), 7.59 (d, *J* = 8.2 Hz, 1H), 7.45 (m, 7H), 7.31–7.25 (m, 1H), 7.08–7.00 (m, 2H), 6.70 (d, *J* = 8.7 Hz, 1H), 4.65 (s, 2H), 4.53 (s, 2H), 1.91 (s, 6H). <sup>13</sup>C NMR (CD<sub>2</sub>Cl<sub>2</sub>): δ 148.2, 148.0, 147.8, 144.5, 142.5, 138.9, 137.6, 136.2, 133.2, 131.5, 129.2, 129.1, 127.9, 127.8, 127.4, 127.3, 125.9, 123.6, 119.4, 117.3, 116.7, 112.3, 112.3, 24.7. <sup>11</sup>B NMR (CD<sub>2</sub>Cl<sub>2</sub>): δ 55.3.

#### **12-(4-(*Tert*-butyl)-2,6-di(prop-1-en-2-yl)phenyl)-5-phenyl-5,12-dihydrobenzo[*b*]naphtho[2,3-*e*][1,4]azaborinine (2d)**

This compound was prepared in a manner analogous to the synthesis of **1d** using **1c**, BBr<sub>3</sub>, and (4-(*tert*-butyl)-2,6-di(prop-1-en-2-yl)phenyl)lithium to give **2d** as a yellow powder (yield: 0.19 g, 40%). <sup>1</sup>H NMR (CD<sub>2</sub>Cl<sub>2</sub>): δ 8.50 (s, 1H), 7.85 (dd, *J* = 7.5, 1.9 Hz, 2H), 7.80–7.74 (m, 2H), 7.71–7.65 (m, 1H), 7.59 (d, *J* = 8.1 Hz, 1H), 7.45–7.37 (m, 6H), 7.28 (ddd, *J* = 8.0, 6.7, 1.2 Hz, 1H), 7.05–6.99 (m, 2H), 6.69 (d, *J* = 8.6 Hz, 1H), 4.64 (s, 2H), 4.52 (s, 2H), 1.93 (s, 6H), 1.48 (s, 9H). <sup>13</sup>C NMR (CD<sub>2</sub>Cl<sub>2</sub>): δ 150.2, 148.7, 147.8, 147.7, 144.5, 142.5, 138.9, 137.6, 136.2, 133.1, 131.5, 131.1, 129.1, 129.1, 127.8, 127.8, 127.2, 123.6, 123.0, 119.3, 117.0, 116.7, 112.2, 35.0, 31.7, 24.8. <sup>11</sup>B NMR (CD<sub>2</sub>Cl<sub>2</sub>): δ 55.3.

#### **12-(4-(*Tert*-butyl)-2,6-di(prop-1-en-2-yl)phenyl)-5-(4-(*tert*-butyl)phenyl)-5,12-dihydrobenzo[*b*]naphtho[2,3-*e*][1,4]azaborinine (3d)**

This compound was prepared in a manner analogous to the synthesis of **1d** using **3c**, BBr<sub>3</sub>, and (4-(*tert*-butyl)-2,6-di(prop-1-en-2-yl)phenyl)lithium to give **3d** as a yellow powder (yield: 0.29 g, 43%). <sup>1</sup>H NMR (CD<sub>2</sub>Cl<sub>2</sub>): δ 8.49 (s, 1H), 7.87–7.82 (m, 2H), 7.77 (d, *J* = 8.5 Hz, 2H), 7.60 (s, 1H), 7.44–7.37 (m, 4H), 7.33 (d, *J* = 8.4 Hz, 2H), 7.26 (d, *J* = 6.8 Hz, 1H), 7.07 (s, 1H), 7.01 (t, *J* = 6.8 Hz, 1H), 6.71 (d, *J* = 8.7 Hz, 1H), 4.64 (s, 2H), 4.52 (s, 2H), 1.92 (s, 6H), 1.51 (s, 9H), 1.48 (s, 9H). <sup>13</sup>C NMR (CD<sub>2</sub>Cl<sub>2</sub>): δ 152.3, 150.1, 148.7, 148.0, 147.8, 144.7, 139.7, 138.9, 137.6, 136.2, 133.0, 130.3, 129.1, 128.4, 127.8, 127.2, 123.5, 123.0, 119.2, 117.0, 116.8, 112.2, 35.3, 35.0, 31.7, 24.8. <sup>11</sup>B NMR (CD<sub>2</sub>Cl<sub>2</sub>): δ 52.4.

#### **12-(4-(*Tert*-butyl)-2,6-di(prop-1-en-2-yl)phenyl)-5-(4-(*tert*-butyl)phenyl)-3-methyl-5,12-dihydrobenzo[*b*]naphtho[2,3-*e*][1,4]azaborinine (4d)**

This compound was prepared in a manner analogous to the synthesis of **1d** using **4c**, BBr<sub>3</sub>, and (4-(*tert*-butyl)-2,6-di(prop-1-en-2-yl)phenyl)lithium to give **4d** as a yellow powder (yield: 0.37 g, 52%). <sup>1</sup>H NMR (CD<sub>2</sub>Cl<sub>2</sub>): δ 8.45 (s, 1H), 7.86–7.70 (m, 4H), 7.59 (d, *J* = 8.4 Hz, 1H), 7.43–7.35 (m, 3H), 7.29 (dd, *J* = 12.4, 8.3 Hz, 3H), 7.01 (s, 1H), 6.85 (d, *J* = 7.8 Hz, 1H), 6.52 (s, 1H), 4.63 (d, *J* = 1.5 Hz, 2H), 4.52 (s, 2H), 2.29 (s, 3H), 1.91 (s, 6H), 1.51 (s, 9H), 1.48 (s, 9H). <sup>13</sup>C NMR (CD<sub>2</sub>Cl<sub>2</sub>): δ 152.2, 150.0, 148.7, 148.1, 147.7, 143.9, 139.6, 138.6, 137.6, 136.1, 130.3, 129.0, 128.3, 127.7, 127.6, 127.3, 123.4, 123.0, 120.9, 116.8, 116.7, 112.2, 35.3, 34.9, 31.7, 2.8, 22.6. <sup>11</sup>B NMR (CD<sub>2</sub>Cl<sub>2</sub>): δ 55.4.

### 3-(*Tert*-butyl)-12-(4-(*tert*-butyl)-2,6-di(prop-1-en-2-yl)phenyl)-5-(4-(*tert*-butyl)phenyl)-5,12-dihydrobenzo[*b*]naphtho[2,3-*e*][1,4]azaborinine (**5d**)

This compound was prepared in a manner analogous to the synthesis of **1d** using **5c**, BBr<sub>3</sub>, and (4-(*tert*-butyl)-2,6-di(prop-1-en-2-yl)phenyl)lithium to give **5d** as a yellow powder (yield: 0.19 g, 40%). <sup>1</sup>H NMR (CD<sub>2</sub>Cl<sub>2</sub>): δ 8.45 (s, 1H), 7.86–7.70 (m, 4H), 7.59 (d, *J* = 8.4 Hz, 1H), 7.43–7.35 (m, 3H), 7.29 (dd, *J* = 12.4, 8.3 Hz, 3H), 7.01 (s, 1H), 6.85 (d, *J* = 7.8 Hz, 1H), 6.52 (s, 1H), 4.63 (d, *J* = 1.5 Hz, 2H), 4.52 (s, 2H), 2.29 (s, 3H), 1.91 (s, 6H), 1.51 (s, 9H), 1.48 (s, 9H). <sup>13</sup>C NMR (CD<sub>2</sub>Cl<sub>2</sub>): δ 152.3, 150.0, 148.8, 148.0, 147.7, 144.7, 139.7, 138.7, 137.2, 136.1, 130.4, 129.1, 128.2, 127.7, 127.6, 127.5, 123.3, 123.0, 117.3, 116.8, 113.4, 112.1, 35.5, 35.3, 35.0, 31.7, 31.6, 31.2, 31.0, 24.8. <sup>11</sup>B NMR (CD<sub>2</sub>Cl<sub>2</sub>): δ 55.2.

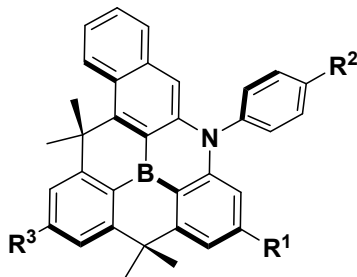

**BzNp (1)**, R<sup>1</sup> = R<sup>2</sup> = R<sup>3</sup> = H

**BuBzNp (2)**, R<sup>1</sup> = R<sup>2</sup> = H, R<sup>3</sup> = <sup>t</sup>Bu

**Bu<sub>2</sub>BzNp (3)**, R<sup>1</sup> = H, R<sup>2</sup> = R<sup>3</sup> = <sup>t</sup>Bu

**Bu<sub>2</sub>BzMeNp (4)**, R<sup>1</sup> = Me, R<sup>2</sup> = R<sup>3</sup> = <sup>t</sup>Bu

**Bu<sub>2</sub>BzBuNp (5)**, R<sup>1</sup> = R<sup>2</sup> = R<sup>3</sup> = <sup>t</sup>Bu

### 4,4,14,14-Tetramethyl-8-phenyl-8,14-dihydro-4H-8-aza-3a2-boraphenaleno[2,1,9,8-defg]tetracene (**BzNp, 1**)

The mixture of **1d** (0.10 g, 0.22 mmol) and scandium(III) triflate (Sc(OTf)<sub>3</sub>, 0.22 g, 0.44 mmol) in anhydrous 1,2-dichloroethane (50 mL) was refluxed for 12 h. After cooling down, a saturated aqueous



solution of NaHCO<sub>3</sub> was added. The organic layer was separated and the aqueous layer was extracted with CH<sub>2</sub>Cl<sub>2</sub>. The combined organic layer was dried over MgSO<sub>4</sub>, filtered, and concentrated under reduced pressure. The crude product was purified through silica gel chromatography using CH<sub>2</sub>Cl<sub>2</sub>/hexane (1:6, v/v) to give **1** as a yellow solid (yield: 0.04 g, 36%). <sup>1</sup>H NMR (CD<sub>2</sub>Cl<sub>2</sub>): δ 8.75 (m, 1H), 7.77 (m, 4H), 7.72–7.65 (m, 3H), 7.54 (t, *J* = 8.1 Hz, 1H), 7.47–7.39 (m, 5H), 6.97 (s, 1H), 6.48 (d, *J* = 8.4 Hz, 1H), 2.23 (s, 6H), 1.83 (s, 6H). <sup>13</sup>C NMR (CD<sub>2</sub>Cl<sub>2</sub>): δ 160.3, 156.9, 154.8, 154.1, 147.5, 144.0, 142.5, 138.5, 133.8, 132.6, 131.5, 131.0, 130.1, 129.0, 128.5, 126.4, 124.8, 123.9, 122.5, 117.9, 112.6, 111.9, 44.8, 43.0, 35.0, 33.6. <sup>11</sup>B NMR (CD<sub>2</sub>Cl<sub>2</sub>): δ 43.1. HRMS (EI): *m/z* [M]<sup>+</sup> calcd for C<sub>34</sub>H<sub>28</sub>BN: 461.2315; found: 461.2313.

**2-(*Tert*-butyl)-4,4,14,14-tetramethyl-8-phenyl-8,14-dihydro-4H-8-aza-3a2-boraphenaleno[2,1,9,8-defg]tetracene (BuBzNp, 2)**

This compound was prepared in a manner analogous to the synthesis of **1** using **2d** (0.19 g, 0.32 mmol) to give **2** as a yellow solid (yield: 0.07 g, 36%). <sup>1</sup>H NMR (CD<sub>2</sub>Cl<sub>2</sub>): δ 8.78–8.71 (m, 1H), 7.82–7.73 (m, 4H), 7.71–7.64 (m, 2H), 7.54 (t, *J* = 8.1 Hz, 1H), 7.48–7.38 (m, 5H), 6.95 (s, 1H), 6.46 (d, *J* = 8.1 Hz, 1H), 2.23 (s, 6H), 1.83 (s, 6H), 1.51 (s, 9H). <sup>13</sup>C NMR (CD<sub>2</sub>Cl<sub>2</sub>): δ 160.0, 157.1, 155.7, 154.4, 154.3, 147.5, 144.0, 142.6, 138.5, 133.6, 131.5, 131.1, 130.1, 129.0, 128.5, 126.3, 125.4, 122.4, 121.9, 121.1, 117.9, 112.5, 111.8, 45.1, 43.2, 36.1, 35.1, 33.7, 31.8. <sup>11</sup>B NMR (CD<sub>2</sub>Cl<sub>2</sub>): δ 44.6. HRMS (EI): *m/z* [M]<sup>+</sup> calcd for C<sub>38</sub>H<sub>36</sub>BN: 517.2941; found: 517.2936.

**2-(*Tert*-butyl)-8-(4-(*tert*-butyl)phenyl)-4,4,14,14-tetramethyl-8,14-dihydro-4H-8-aza-3a2-boraphenaleno[2,1,9,8-defg]tetracene (Bu<sub>2</sub>BzNp, 3)**

This compound was prepared in a manner analogous to the synthesis of **1** using **3d** (0.29 g, 0.51 mmol) to give **3** as a yellow solid (yield: 0.14 g, 48%). <sup>1</sup>H NMR (CD<sub>2</sub>Cl<sub>2</sub>): δ 8.74 (m, 1H), 7.79 (dd, *J* = 5.5, 1.7 Hz, 2H), 7.75 (dd, *J* = 4.4, 1.7 Hz, 2H), 7.70 (dd, *J* = 6.4, 3.4 Hz, 1H), 7.54 (t, *J* = 8.1 Hz, 1H), 7.47–7.38 (m, 3H), 7.38–7.33 (m, 2H), 6.99 (s, 1H), 6.48 (d, *J* = 8.1 Hz, 1H), 2.23 (s, 6H), 1.83 (s, 6H), 1.51 (s, 9H), 1.50 (s, 9H). <sup>13</sup>C NMR (CD<sub>2</sub>Cl<sub>2</sub>): δ 159.9, 157.1, 155.6, 154.3, 154.3, 152.1, 147.6, 144.1, 139.7, 138.5, 133.6, 130.2, 130.1, 128.5, 128.4, 126.2, 125.3, 122.4, 121.9, 121.1, 117.8, 112.6, 111.8, 45.0, 43.2, 36.1, 35.2, 35.1, 33.7, 31.8, 31.7. <sup>11</sup>B NMR (CD<sub>2</sub>Cl<sub>2</sub>): δ 41.2. HRMS (EI): *m/z* [M]<sup>+</sup> calcd for C<sub>42</sub>H<sub>44</sub>BN: 573.3567; found: 573.3569.

**2-(*Tert*-butyl)-8-(4-(*tert*-butyl)phenyl)-4,4,6,14,14-pentamethyl-8,14-dihydro-4H-8-aza-3a2-boraphenaleno[2,1,9,8-defg]tetracene (Bu<sub>2</sub>BzMeNp, 4)**

This compound was prepared in a manner analogous to the synthesis of **1** using **4d** (0.3 g, 0.51 mmol) to give **4** as a yellow solid (yield: 0.11 g, 32%). <sup>1</sup>H NMR (CD<sub>2</sub>Cl<sub>2</sub>): δ 8.73 (dd, *J* = 6.8, 3.5 Hz, 1H), 7.80–7.72 (m, 4H), 7.68 (dd, *J* = 6.5, 3.4 Hz, 1H), 7.44–7.39 (m, 2H), 7.36–7.31 (m, 2H), 7.24 (s, 1H), 6.93 (s, 1H), 6.33 (s, 1H), 2.39 (s, 3H), 2.22 (s, 6H), 1.82 (s, 6H), 1.51 (d, *J* = 2.9 Hz, 18H). <sup>13</sup>C NMR (CD<sub>2</sub>Cl<sub>2</sub>): δ 159.9, 157.0, 155.6, 154.2, 152.1, 147.6, 144.3, 144.1, 139.6, 138.4, 133.5, 130.2, 130.0, 128.5, 128.4, 126.2, 125.2, 122.3, 121.8, 121.1, 117.7, 112.5, 111.7, 45.0, 43.1, 36.0, 35.2, 35.1, 33.6, 31.8, 31.6, 21.1. <sup>11</sup>B NMR (CD<sub>2</sub>Cl<sub>2</sub>): δ 44.7. HRMS (EI): *m/z* [M]<sup>+</sup> calcd for C<sub>43</sub>H<sub>46</sub>BN: 587.3723; found: 587.3722.

### **2,6-Di-*tert*-butyl-8-(4-(*tert*-butyl)phenyl)-4,4,14,14-tetramethyl-8,14-dihydro-4H-8-aza-3a2-boraphenaleno[2,1,9,8-defg]tetracene (Bu<sub>2</sub>BzBuNp, **5**)**

This compound was prepared in a manner analogous to the synthesis of **1** using **5d** (0.2 g, 0.32 mmol) to give **5** as a yellow solid (yield: 0.06 g, 35%). <sup>1</sup>H NMR (CD<sub>2</sub>Cl<sub>2</sub>): δ 8.74 (dd, *J* = 6.5, 3.6 Hz, 1H), 7.76 (dd, *J* = 8.5, 5.7 Hz, 4H), 7.70 (dd, *J* = 6.3, 3.5 Hz, 1H), 7.46 (d, *J* = 1.0 Hz, 1H), 7.44–7.39 (m, 2H), 7.36 (d, *J* = 8.4 Hz, 2H), 7.02 (s, 1H), 6.48 (d, *J* = 1.0 Hz, 1H), 2.23 (s, 6H), 1.83 (s, 6H), 1.51 (d, *J* = 0.8 Hz, 18H), 1.25 (s, 9H). <sup>13</sup>C NMR (CD<sub>2</sub>Cl<sub>2</sub>): δ 159.8, 157.2, 156.3, 155.4, 154.5, 154.1, 152.1, 147.7, 144.3, 139.7, 138.5, 130.3, 130.1, 128.5, 128.2, 126.1, 125.2, 122.3, 121.8, 121.2, 115.6, 111.7, 109.7, 45.1, 43.3, 36.0, 36.0, 35.2, 33.6, 31.8, 31.6, 31.3. <sup>11</sup>B NMR (CD<sub>2</sub>Cl<sub>2</sub>): δ 45.7. HRMS (EI): *m/z* [M]<sup>+</sup> calcd for C<sub>46</sub>H<sub>52</sub>BN: 629.4193; found: 629.4193.

### **Cyclic voltammetry**

Cyclic voltammetry measurements were carried out at room temperature in CH<sub>2</sub>Cl<sub>2</sub> or THF (5 × 10<sup>-4</sup> M) with a three-electrode cell configuration comprising platinum working and counter electrodes and an Ag/AgNO<sub>3</sub> (0.01 M in CH<sub>3</sub>CN) reference electrode at room temperature. Tetra-*n*-butylammonium hexafluorophosphate (0.1 M) was used as the supporting electrolyte. The oxidation potentials were recorded at a scan rate of 100–200 mV/s and are reported against the ferrocene/ferrocenium (Fc/Fc<sup>+</sup>) redox couple. The HOMO and LUMO energy levels were determined from the electrochemical oxidation and reduction (*E*<sub>1/2</sub>) peaks of cyclic voltammograms.

### **Computational details**

The computational study was carried out using the PBE0 hybrid functional<sup>1</sup> and 6-31+G(d,p) basis set implemented in GAUSSIAN 16 software package.<sup>2</sup> The ground (S<sub>0</sub>) and lowest singlet (S<sub>1</sub>) excited states of compounds **1–5** were optimized using density functional theory (DFT) and time-dependent DFT (TD-DFT) calculations, respectively, with the same functional and basis set. Natural transition

orbitals (NTOs) were utilized to examine the characteristics for their electronic transitions from  $S_0$  to  $S_1$  state.<sup>3</sup> The polarizable continuum model using the integral equation formalism (IEFPCM) was employed to take account for the influence of solvent medium (toluene) on molecular geometric and electronic structures.<sup>4</sup> Nucleus-independent chemical shift (NICS) values were computed to identify the influence of increased conjugation length on the spectral wavelength at the PBE0/6-311++G(d,p)//PBE0/6-31G(d,p) level of theory.<sup>5</sup> The NICS(1) values obtained at 1 Å above the ring centers were utilized to reduce the local effects of sigma bonds.<sup>6</sup> The root-mean-square displacement values of structural deviation during transition between  $S_0$  and  $S_1$  states were computed using Multiwfn programs.<sup>7</sup>

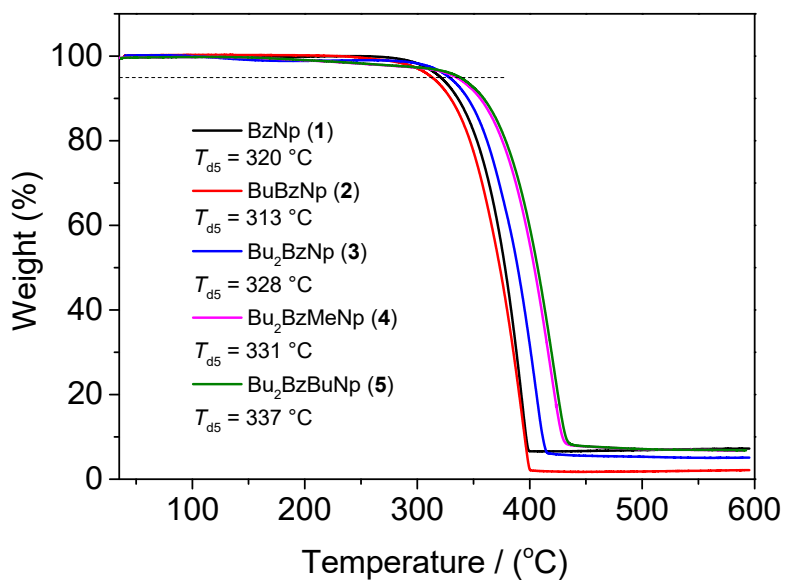

**Fig. S1.** TGA curves of **1–5**.

**Table S1.** Oxidation and reduction potentials, optical bandgaps, and HOMO/LUMO energy levels of **1–5**.

| compd    | $E_{\text{ox}}$ (V) <sup>a</sup> | $E_{\text{red}}$ (V) <sup>a</sup> | $E_g$ (eV) | HOMO (eV) | LUMO (eV) |
|----------|----------------------------------|-----------------------------------|------------|-----------|-----------|
| <b>1</b> | 0.52                             | −2.48                             | 3.00       | −5.32     | −2.32     |
| <b>2</b> | 0.51                             | −2.49                             | 3.00       | −5.31     | −2.31     |
| <b>3</b> | 0.48                             | −2.50                             | 2.98       | −5.28     | −2.30     |
| <b>4</b> | 0.46                             | −2.59                             | 3.05       | −5.26     | −2.21     |
| <b>5</b> | 0.44                             | −2.62                             | 3.06       | −5.24     | −2.18     |

<sup>a</sup>Half-wave potential ( $E_{1/2}$ ).

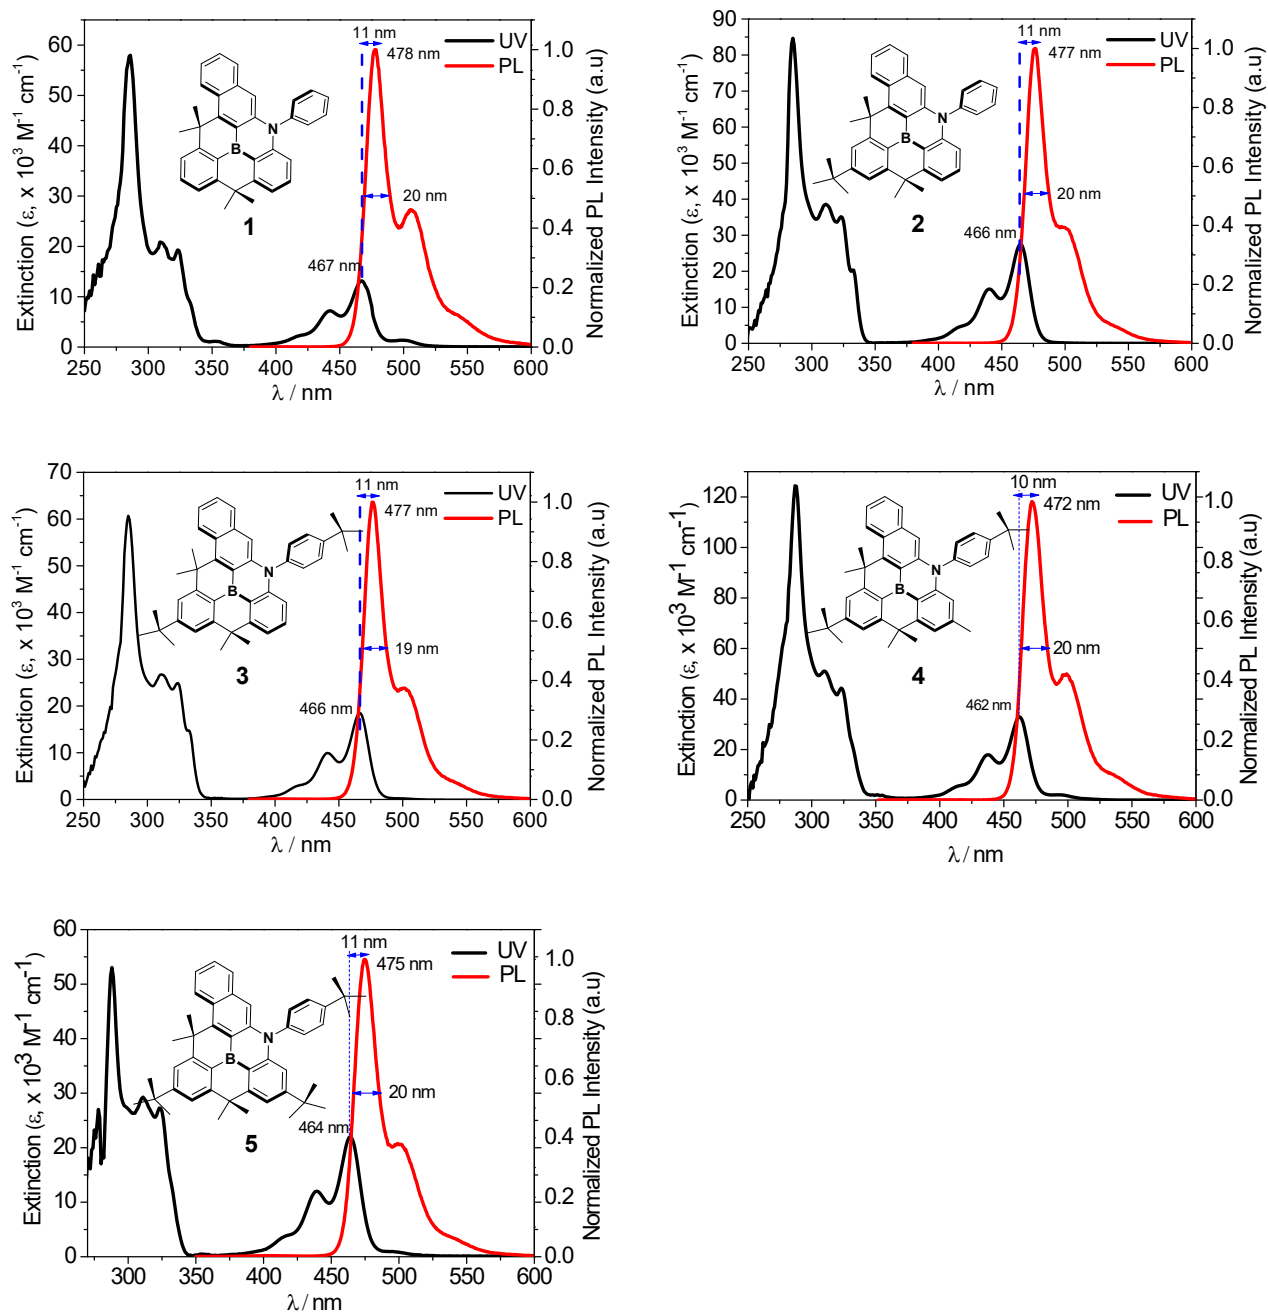

**Fig. S2.** UV/Vis absorption and PL spectra of 1–5 in toluene ( $2.0 \times 10^{-5}$  M) at 298 K. The absorption and emission maximum wavelengths, Stokes shifts, and FWHMs are given.

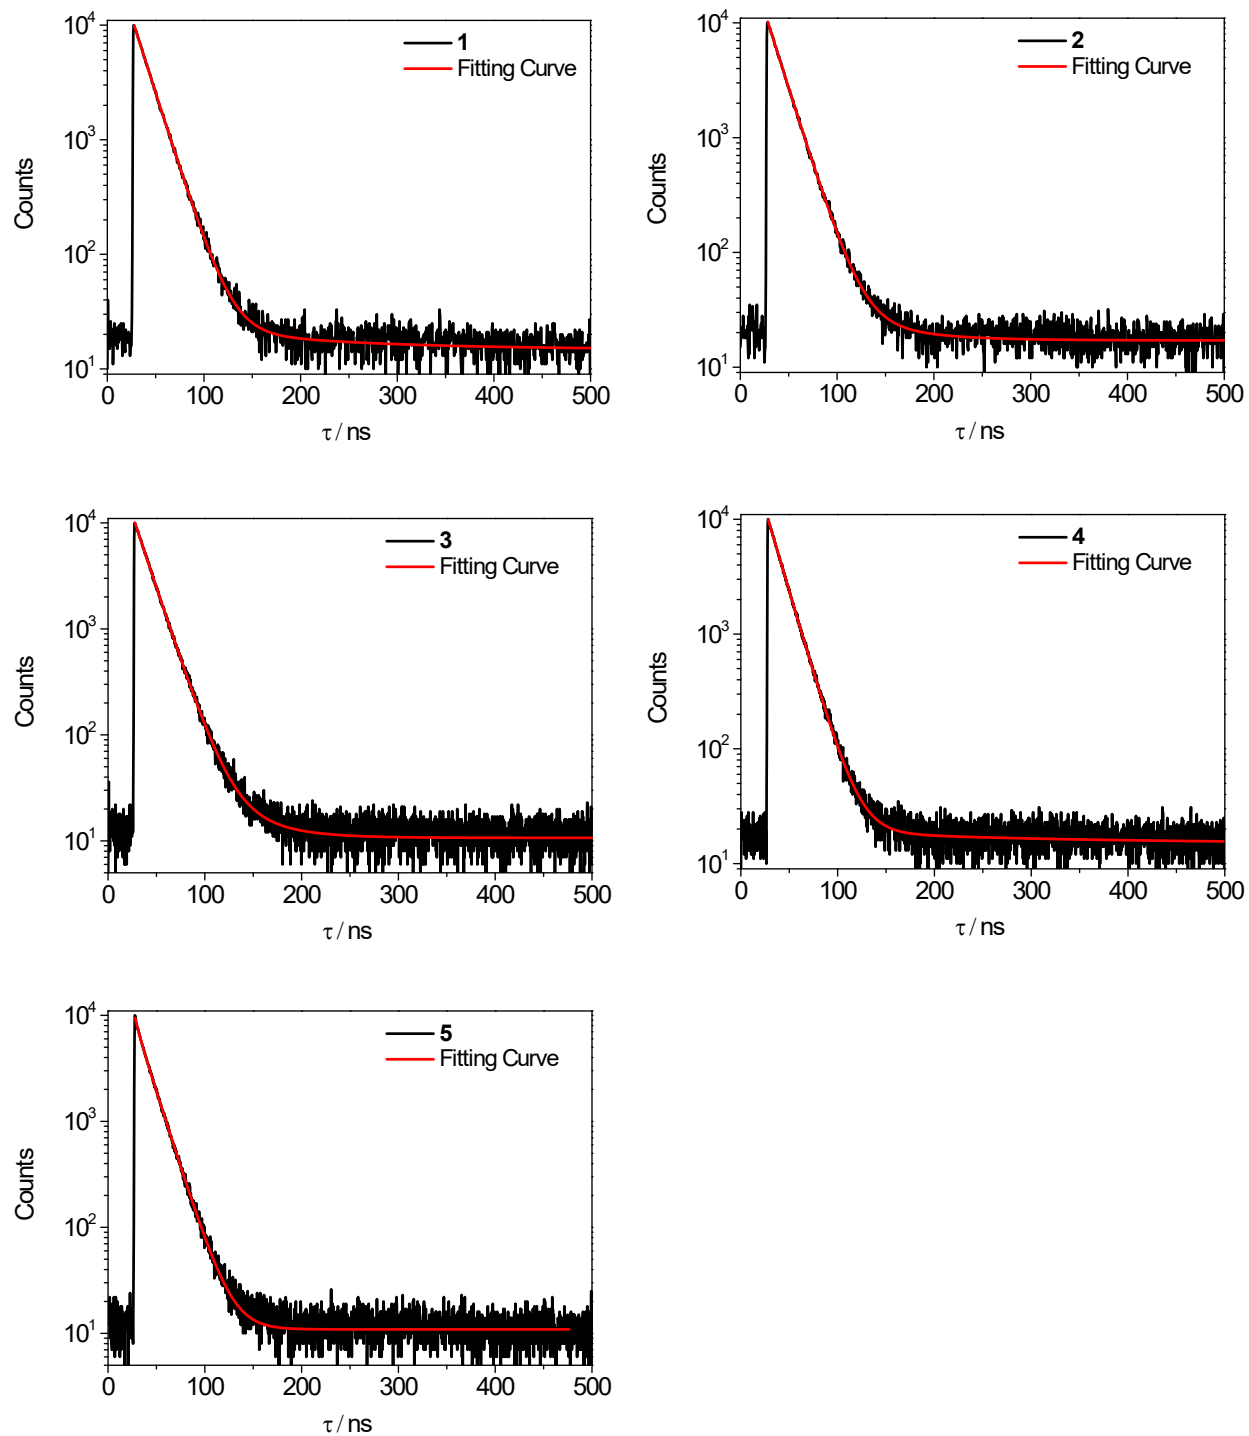

**Fig. S3.** Transient PL decay curves of 1–5 in toluene at 298 K.

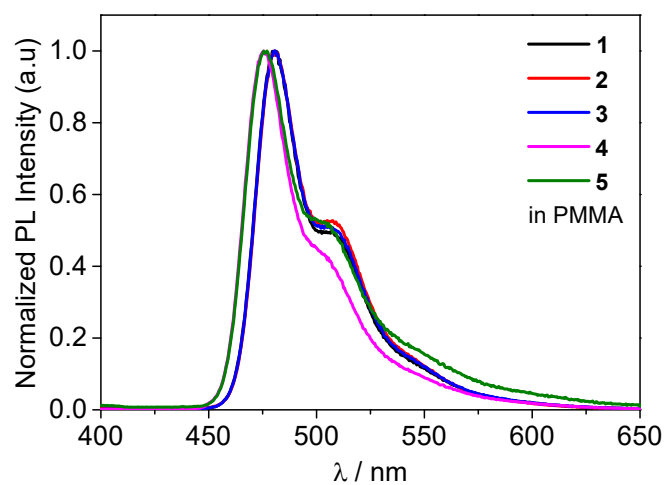

| compd | $\lambda_{\text{PL}}$ (nm) | PLQY (%) |
|-------|----------------------------|----------|
| 1     | 481                        | ~100     |
| 2     | 480                        | ~100     |
| 3     | 480                        | ~100     |
| 4     | 475                        | ~100     |
| 5     | 478                        | ~100     |

**Fig. S4.** PL spectra of PMMA films doped with 1 wt% **1–5** ( $\lambda_{\text{exc}} = 335$  nm).

**Table S2.** The absorption wavelength ( $\lambda_{\text{abs}}$  in nm) and corresponding oscillator strength ( $f$ ) for the lowest energy electronic excitation, i.e.,  $S_0$  to  $S_1$  transition, of compounds **1–5** obtained using the TDDFT calculations at the PBE0/6-31+g(d,p) level of theory.

| compd    | $\lambda_{\text{abs}}$ | $f$    | Major contribution              |
|----------|------------------------|--------|---------------------------------|
| <b>1</b> | 430                    | 0.1711 | HOMO $\rightarrow$ LUMO (98.3%) |
| <b>2</b> | 427                    | 0.1950 | HOMO $\rightarrow$ LUMO (98.2%) |
| <b>3</b> | 429                    | 0.2033 | HOMO $\rightarrow$ LUMO (98.2%) |
| <b>4</b> | 425                    | 0.2055 | HOMO $\rightarrow$ LUMO (98.1%) |
| <b>5</b> | 429                    | 0.1947 | HOMO $\rightarrow$ LUMO (98.2%) |

**Table S3.** The emission wavelength ( $\lambda_{\text{em}}$  in nm) and corresponding oscillator strength ( $f$ ) for the lowest energy electronic de-excitation, i.e.,  $S_1$  to  $S_0$  transition, of compounds **1–5** obtained using the TDDFT calculations at the PBE0/6-31+g(d,p) level of theory.

| compd    | $\lambda_{\text{em}}$ | $f$    | Major contribution              |
|----------|-----------------------|--------|---------------------------------|
| <b>1</b> | 456                   | 0.1552 | HOMO $\rightarrow$ LUMO (98.5%) |
| <b>2</b> | 452                   | 0.1760 | HOMO $\rightarrow$ LUMO (98.4%) |
| <b>3</b> | 454                   | 0.1831 | HOMO $\rightarrow$ LUMO (98.5%) |
| <b>4</b> | 452                   | 0.1791 | HOMO $\rightarrow$ LUMO (98.4%) |
| <b>5</b> | 454                   | 0.1752 | HOMO $\rightarrow$ LUMO (98.5%) |



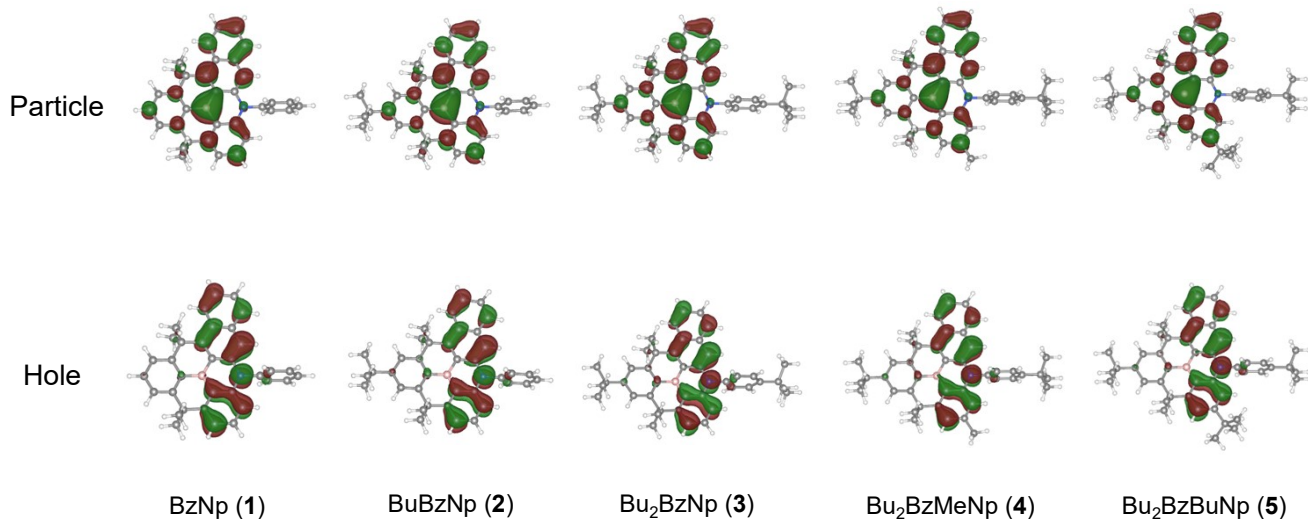

**Fig. S5.** Natural transition orbitals (NTO) of compounds **1–5** for the transitions from  $S_0$  to  $S_1$  state obtained using the TDDFT calculations at the PBE0/6-31+g(d,p) level of theory.

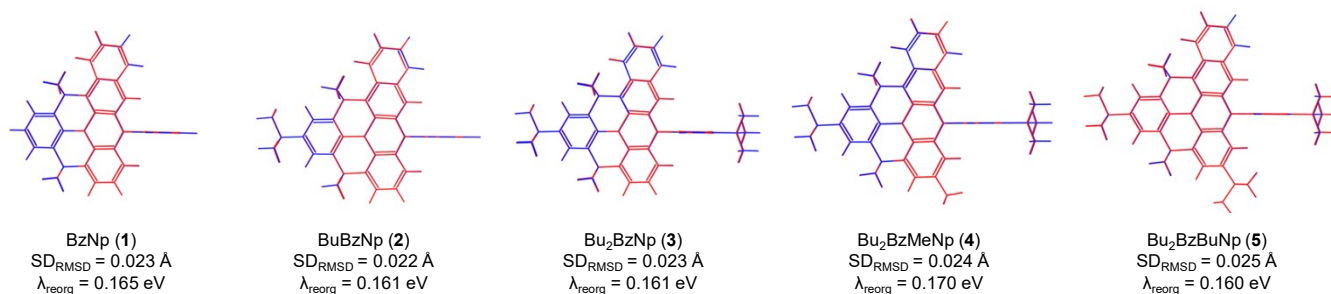

**Fig. S6.** Structural overlap of the ground ( $S_0$ , red) and lowest singlet excited ( $S_1$ , blue) states for the compounds **1–5**. The root-mean-square displacement values of structural deviation ( $SD_{\text{RMSD}}$ ) and corresponding reorganization energies ( $\lambda_{\text{reorg}}$ ) are provided.

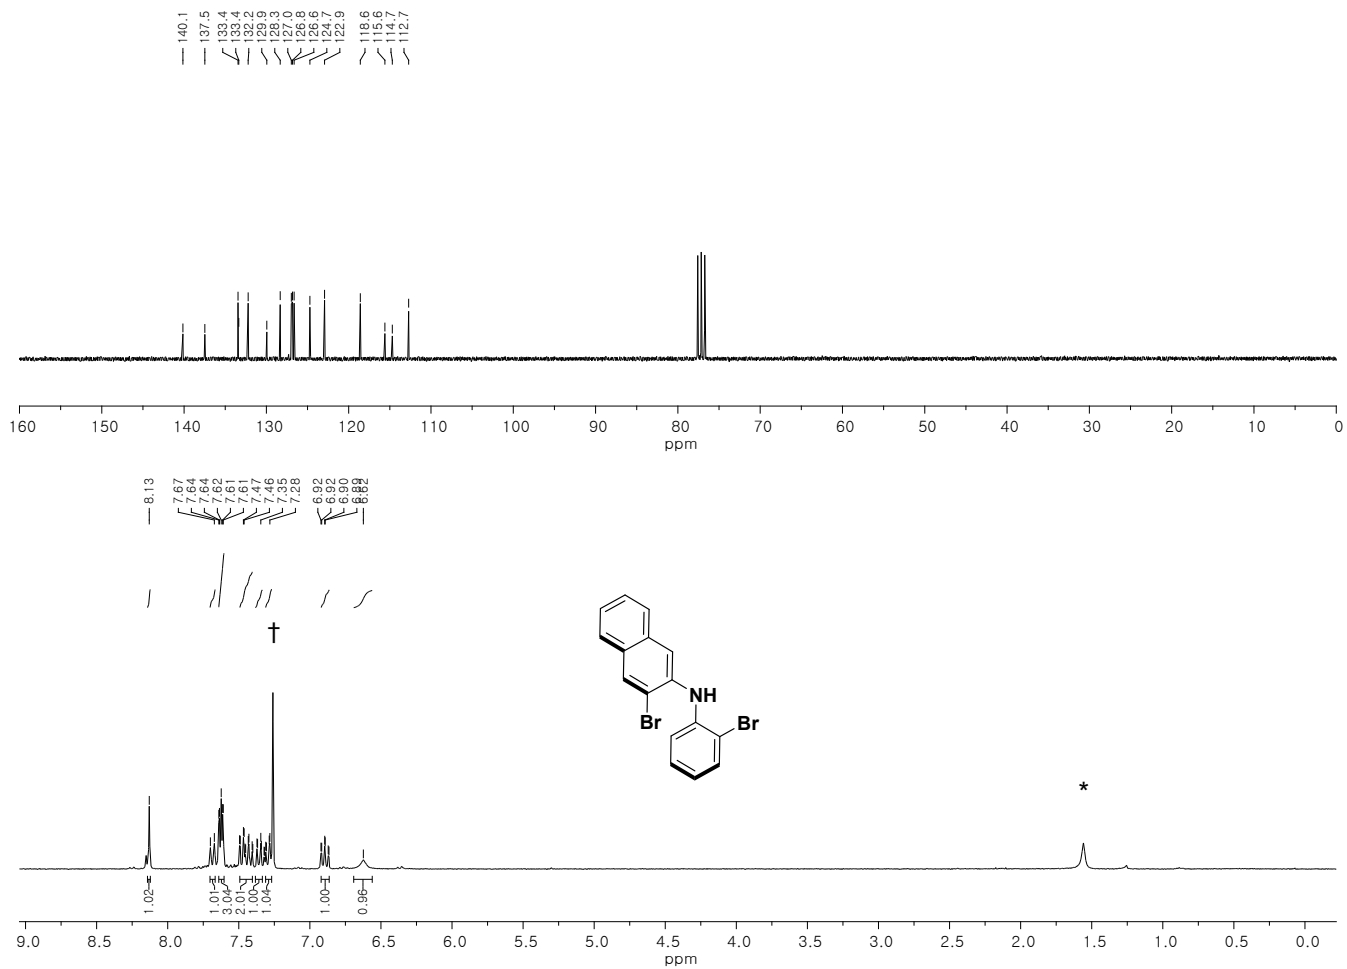

**Fig. S7.**  $^{13}\text{C}$  (top) and  $^1\text{H}$  (bottom) NMR spectra of **1a** in  $\text{CDCl}_3$  (\* from water and † from residual  $\text{CHCl}_3$ ).

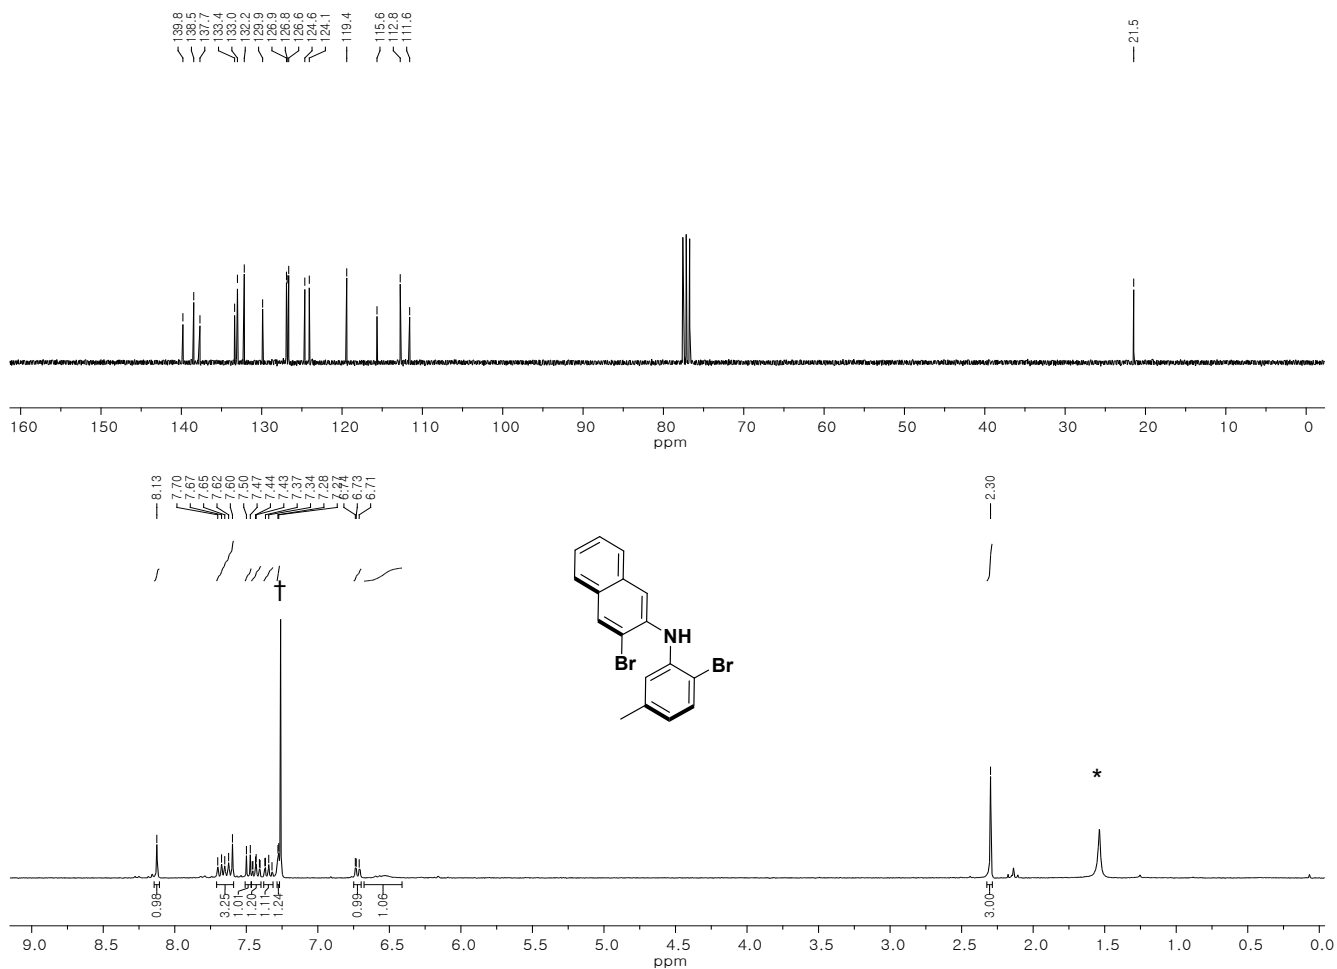

**Fig. S8.** <sup>13</sup>C (top) and <sup>1</sup>H (bottom) NMR spectra of **4a** in CDCl<sub>3</sub> (\* from water and † from residual CHCl<sub>3</sub>).

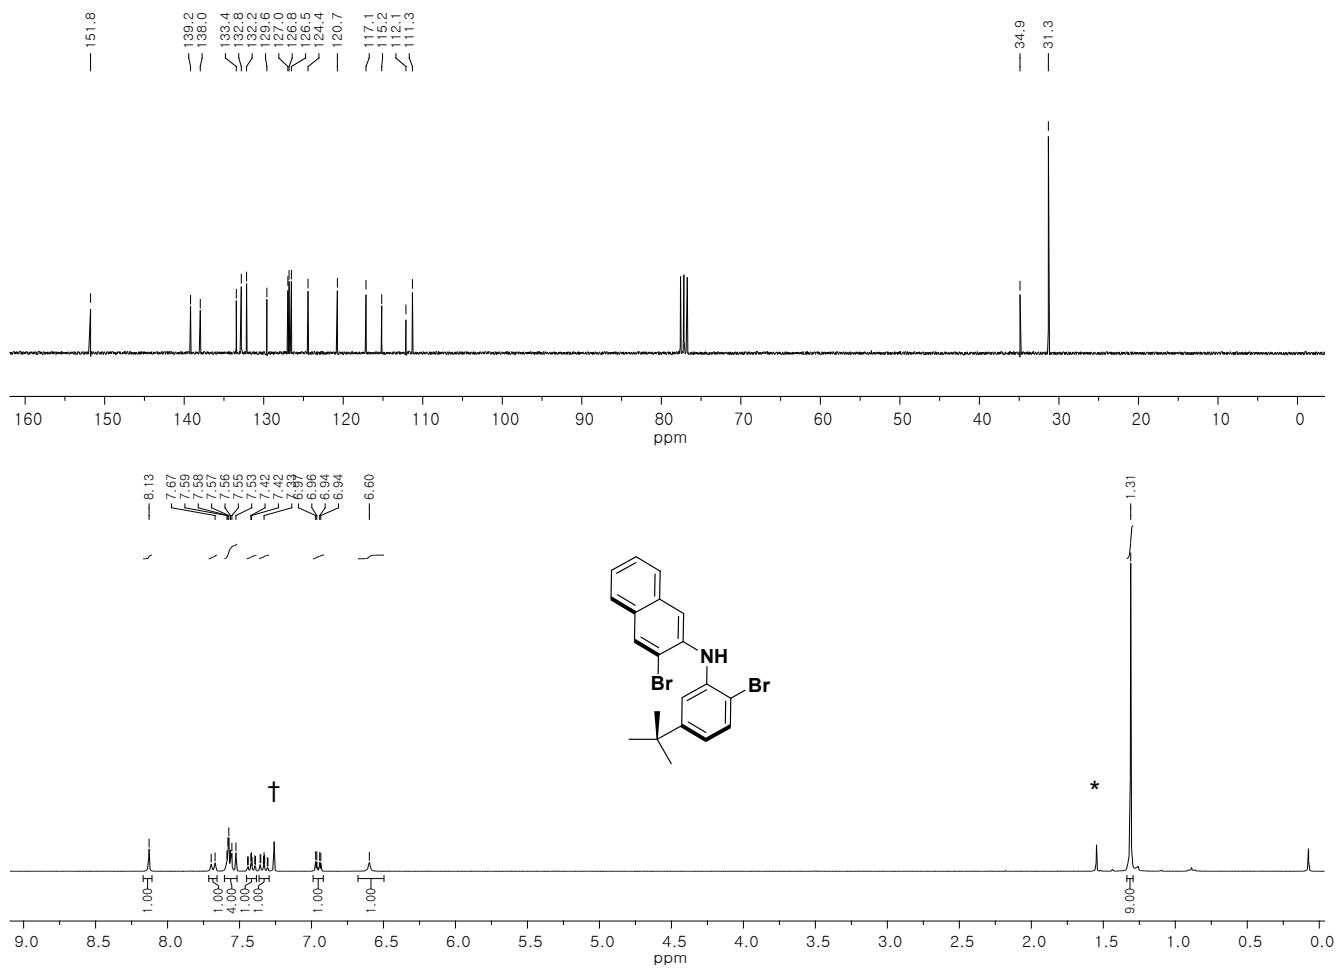

**Fig. S9.** <sup>13</sup>C (top) and <sup>1</sup>H (bottom) NMR spectra of **5a** in CDCl<sub>3</sub> (\* from water and † from residual CHCl<sub>3</sub>).

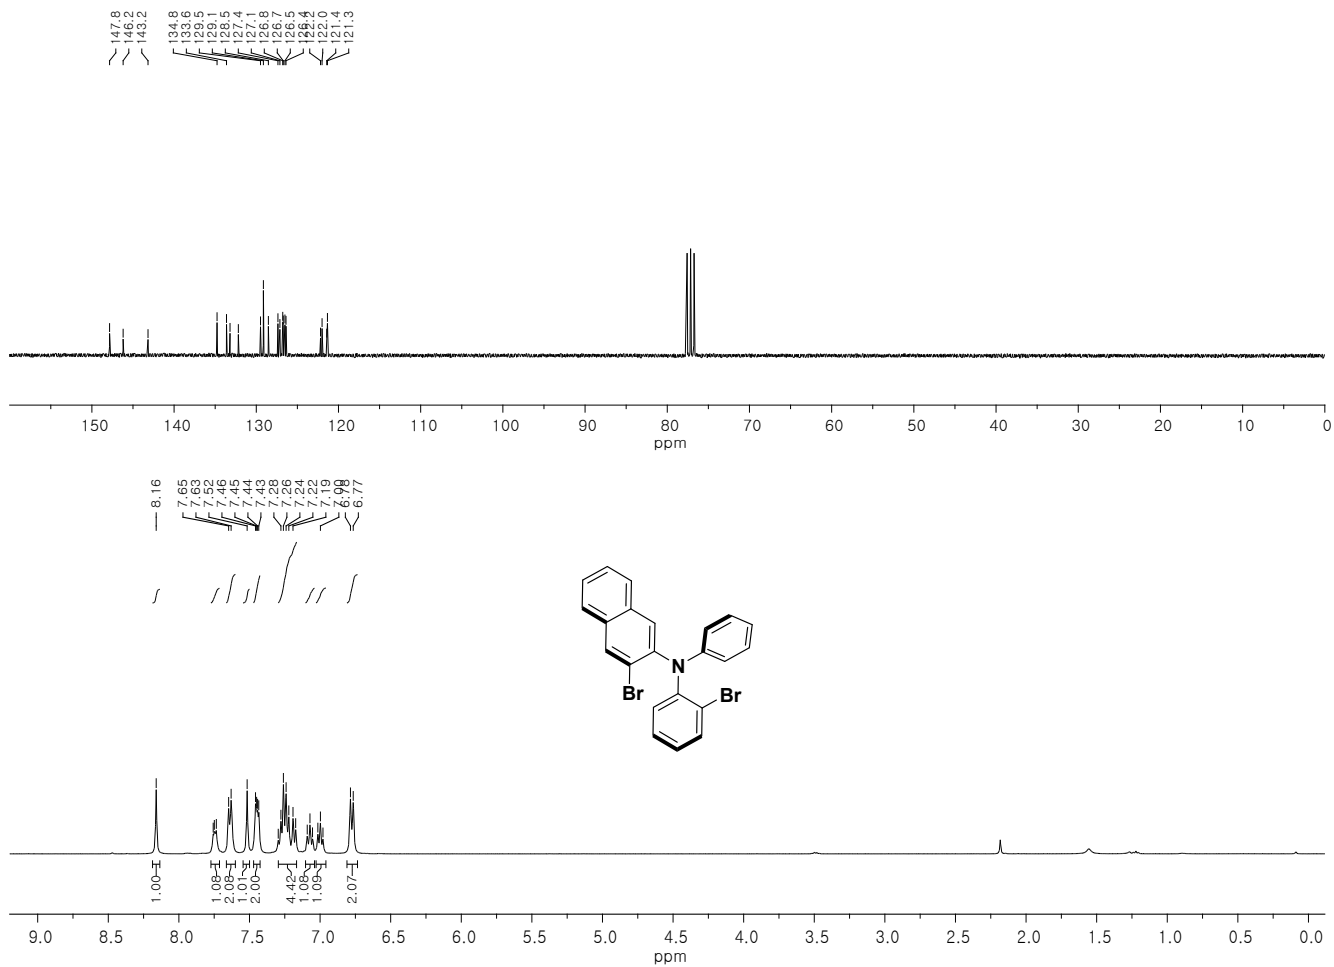

**Fig. S10.** <sup>13</sup>C (top) and <sup>1</sup>H (bottom) NMR spectra of **1b** in CDCl<sub>3</sub>.

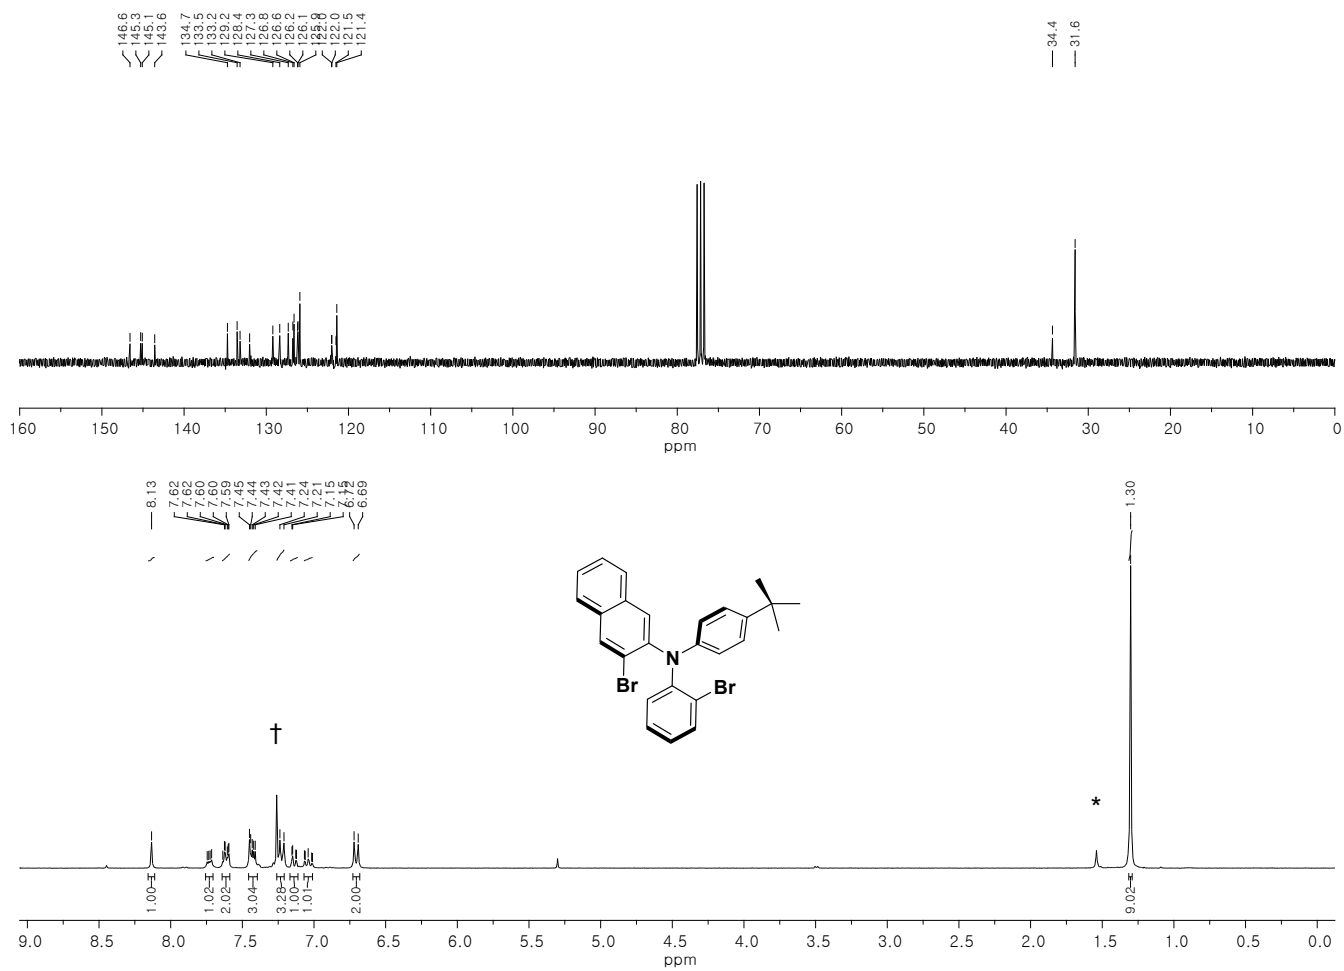

**Fig. S11.**  $^{13}\text{C}$  (top) and  $^1\text{H}$  (bottom) NMR spectra of **3b** in  $\text{CDCl}_3$  (\* from water and † from residual  $\text{CHCl}_3$ ).

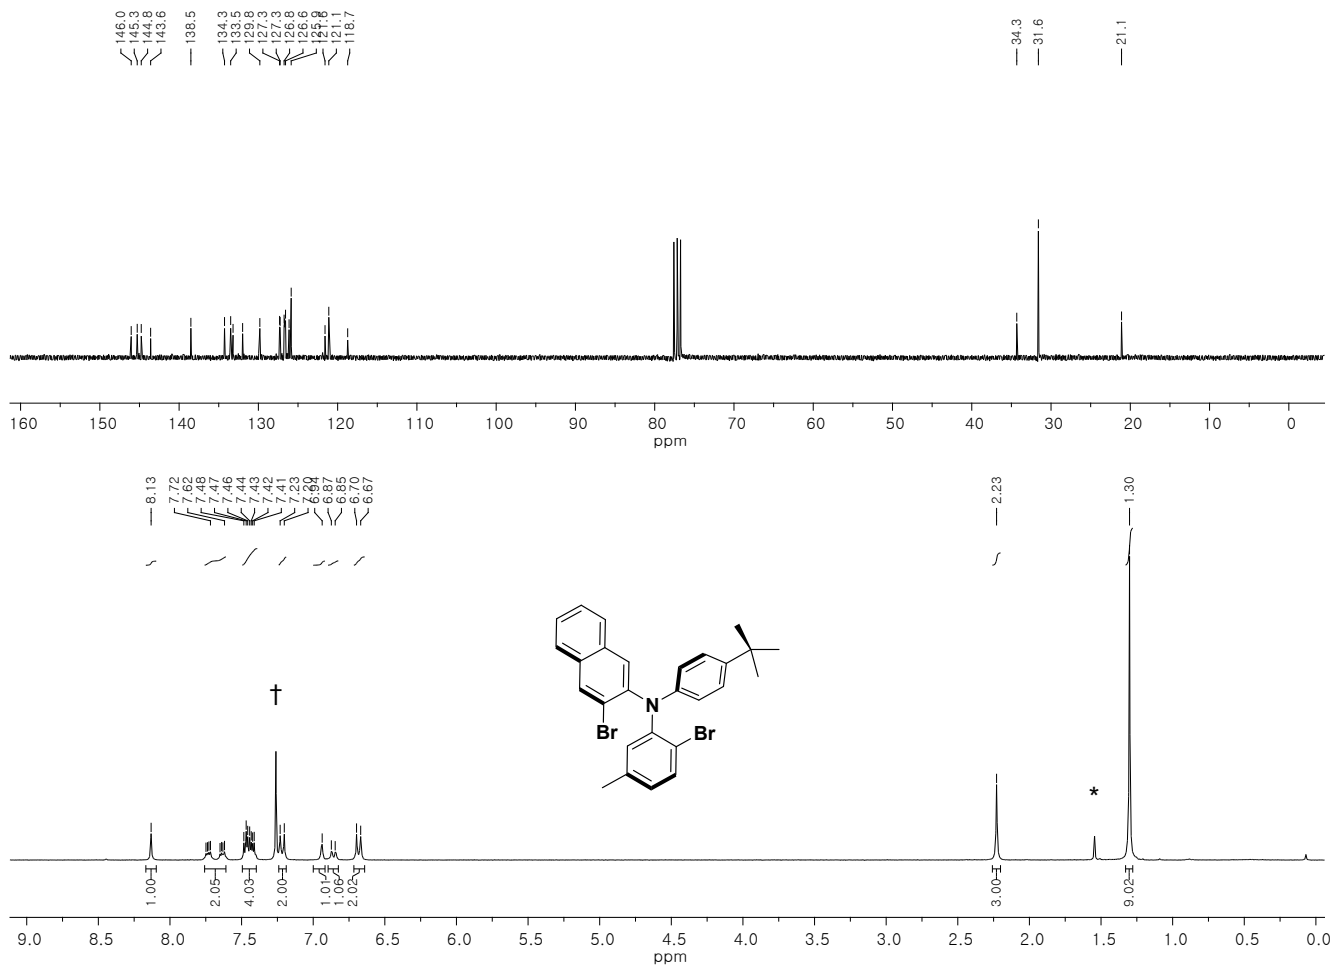

**Fig. S12.** <sup>13</sup>C (top) and <sup>1</sup>H (bottom) NMR spectra of **4b** in CDCl<sub>3</sub> (\* from water and † from residual CHCl<sub>3</sub>).

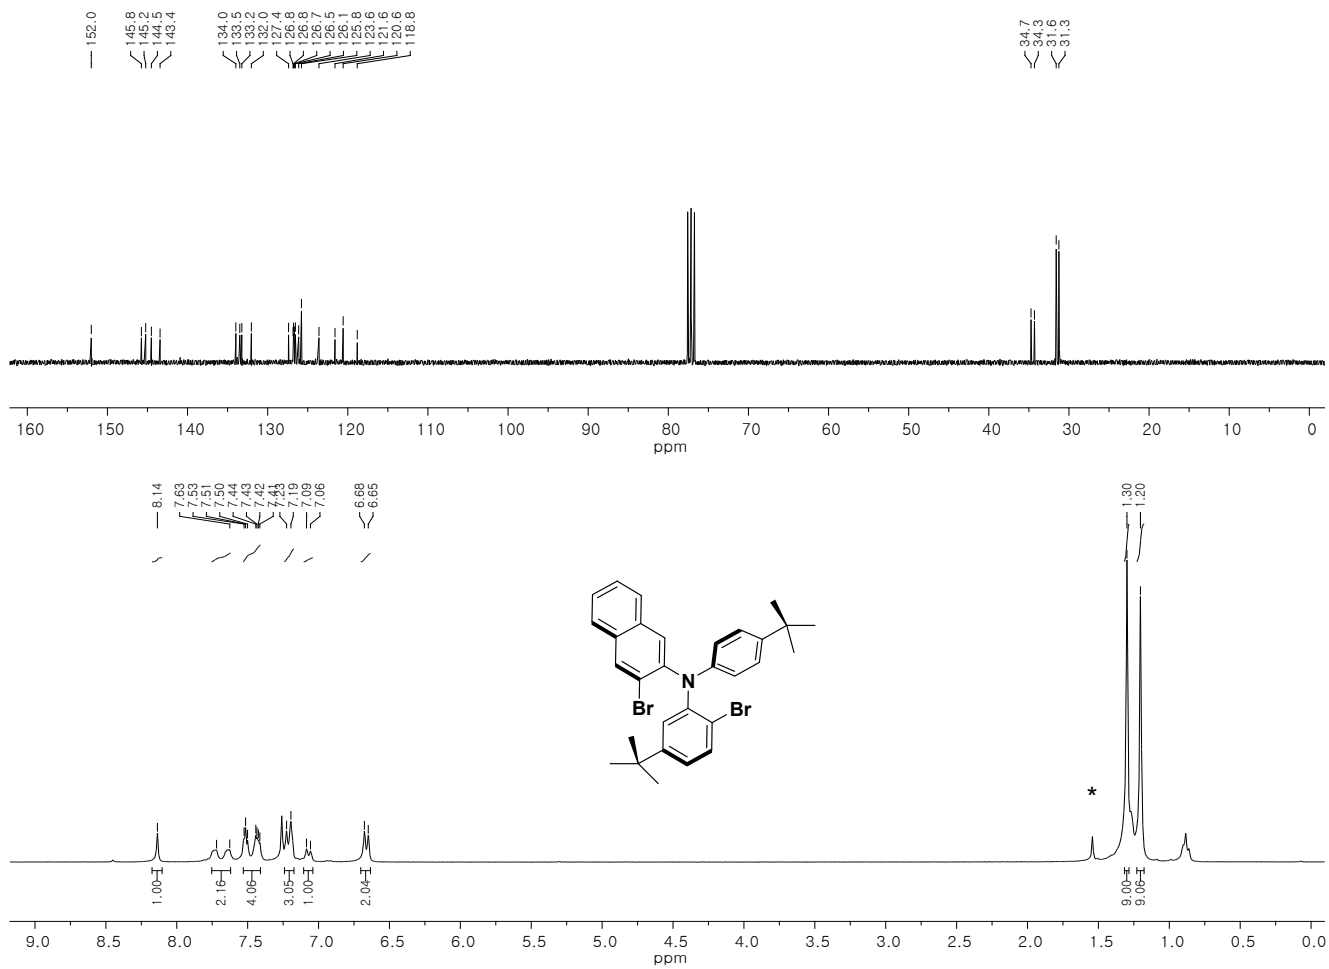

**Fig. S13.**  $^{13}\text{C}$  (top) and  $^1\text{H}$  (bottom) NMR spectra of **5b** in  $\text{CDCl}_3$  (\* from water).



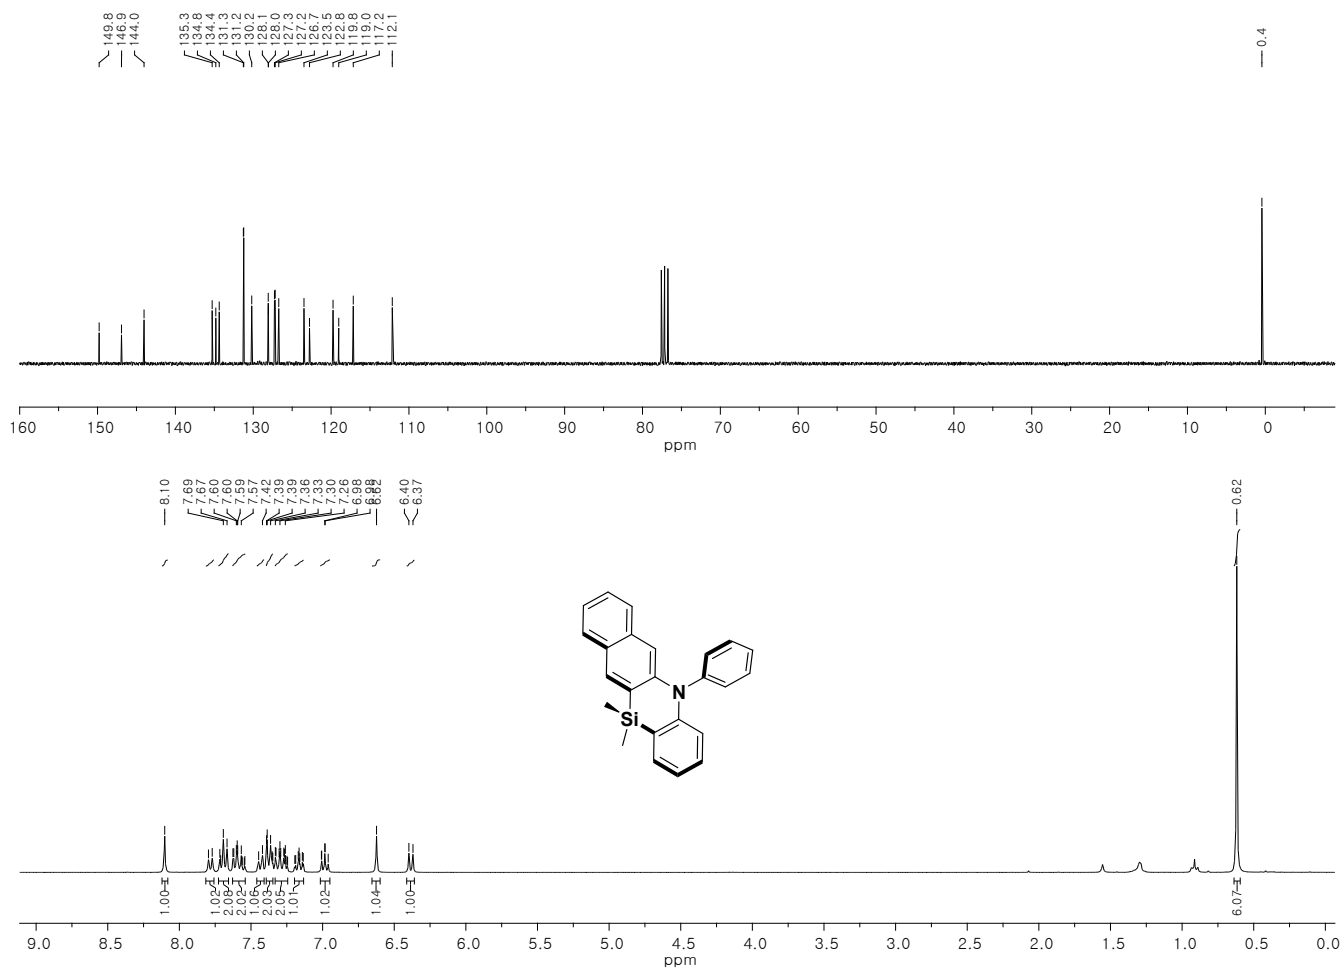

**Fig. S14.**  $^{13}\text{C}$  (top) and  $^1\text{H}$  (bottom) NMR spectra of **1c** in  $\text{CDCl}_3$ .

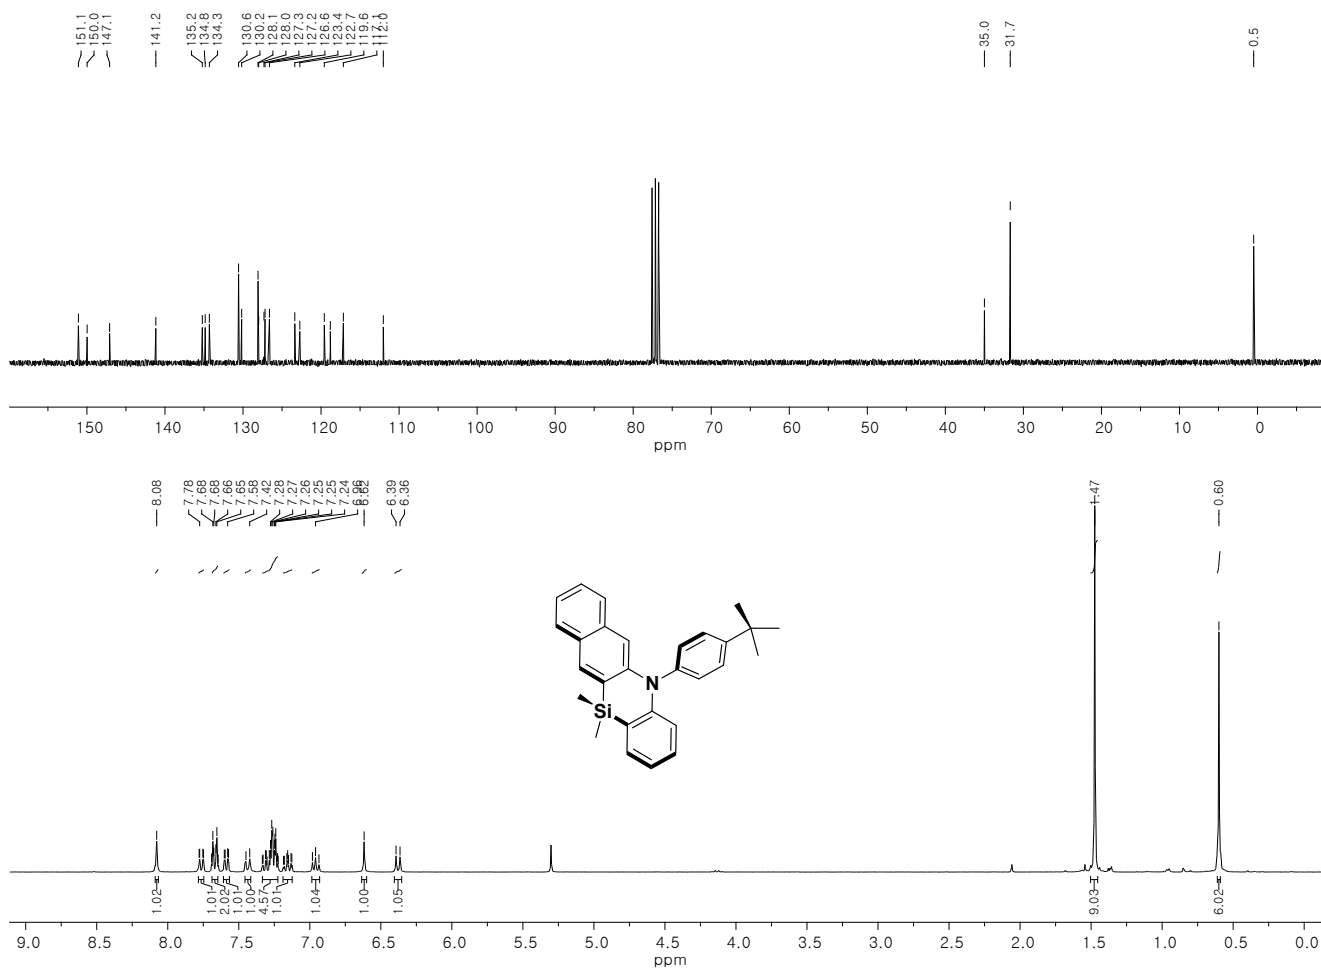

**Fig. S15.**  $^{13}\text{C}$  (top) and  $^1\text{H}$  (bottom) NMR spectra of **3c** in  $\text{CDCl}_3$ .

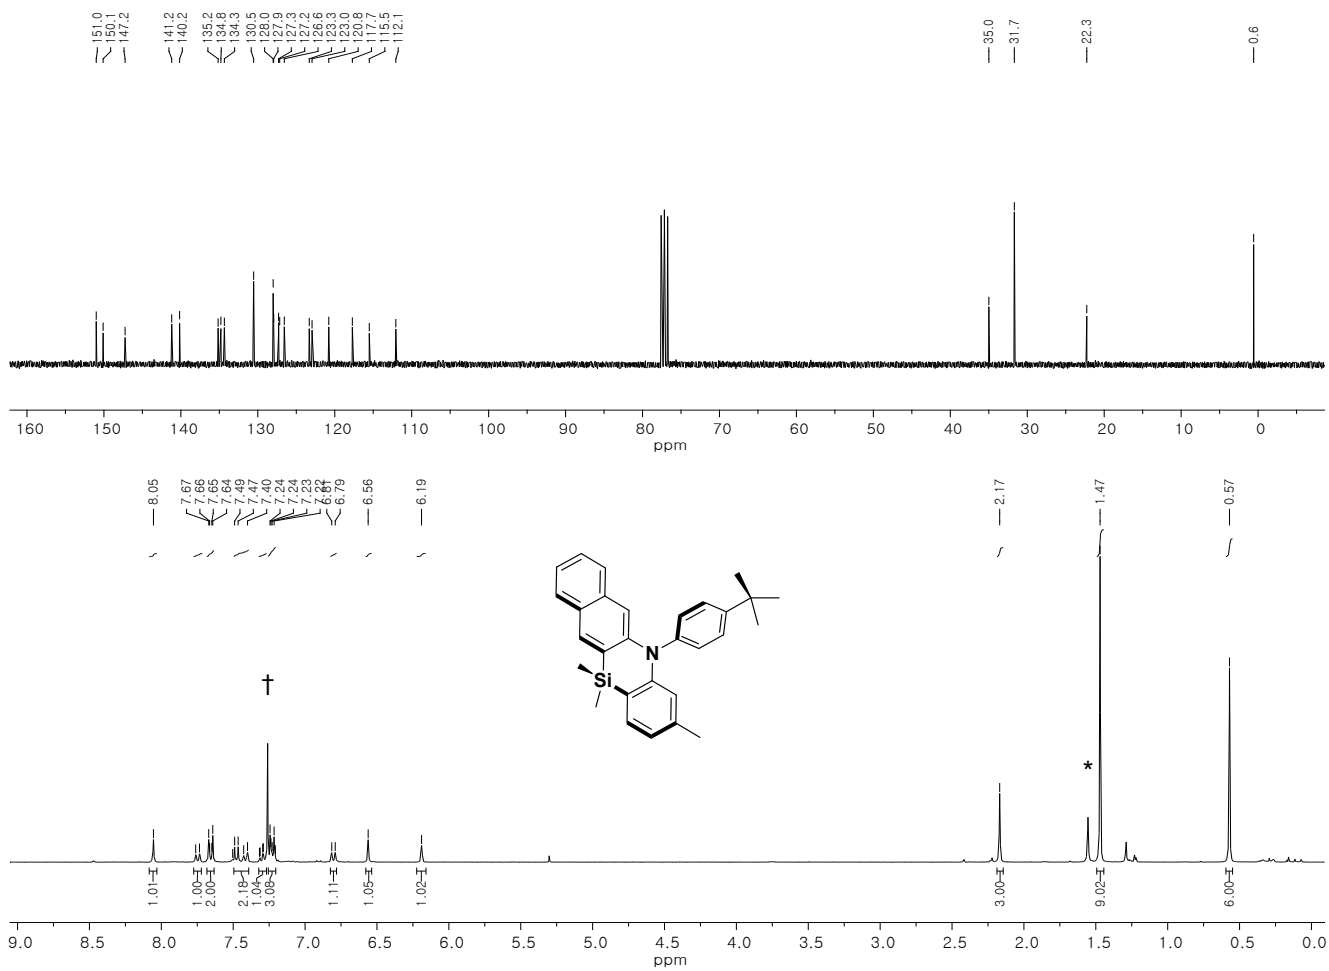

**Fig. S16.**  $^{13}\text{C}$  (top) and  $^1\text{H}$  (bottom) NMR spectra of **4c** in  $\text{CDCl}_3$  (\* from water and † from residual  $\text{CHCl}_3$ ).

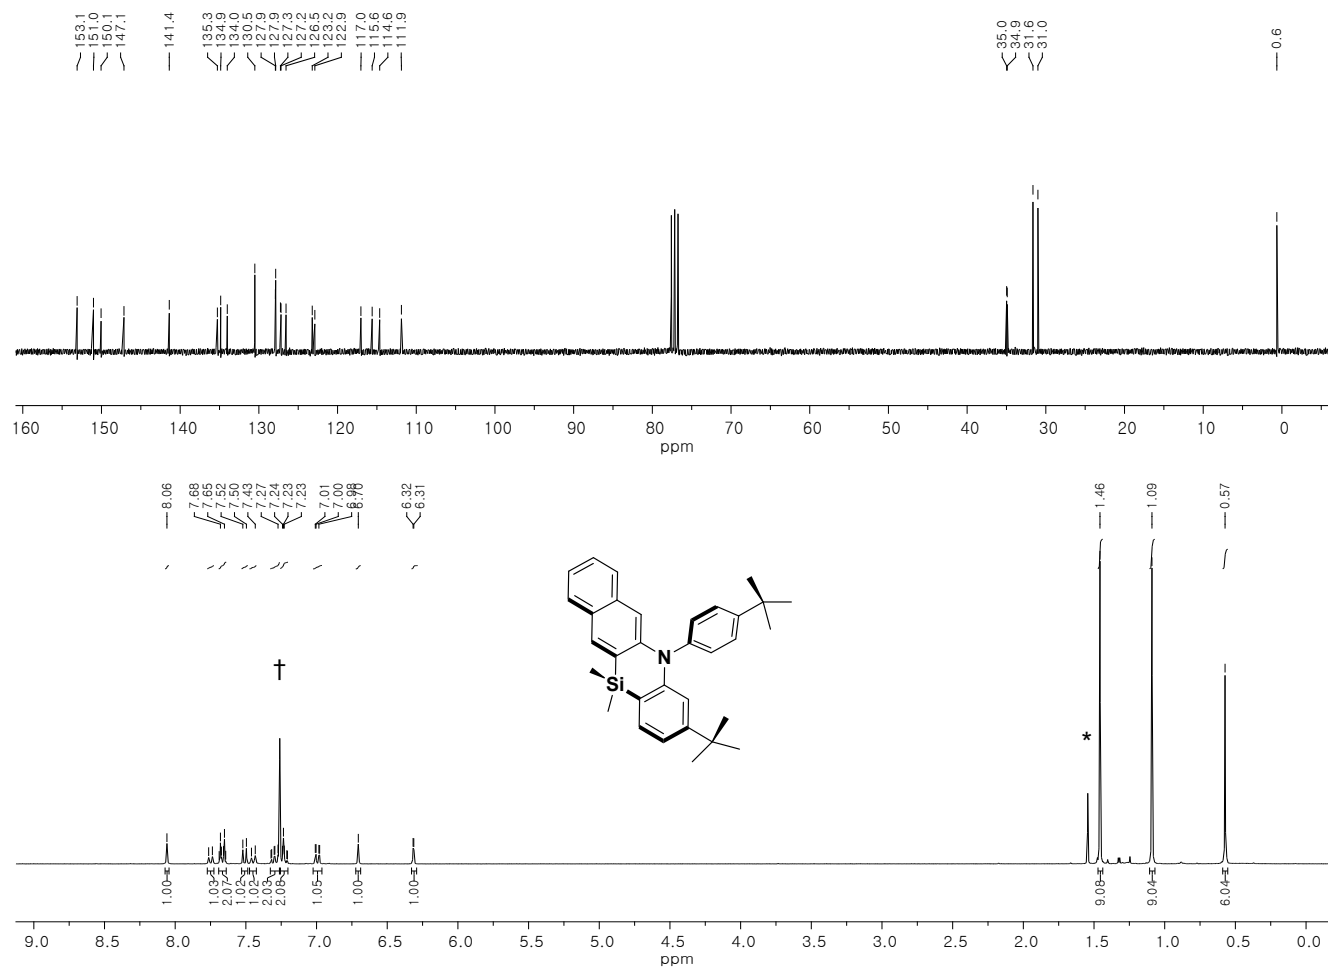

**Fig. S17.**  $^{13}\text{C}$  (top) and  $^1\text{H}$  (bottom) NMR spectra of **5c** in  $\text{CDCl}_3$  (\* from water and † from residual  $\text{CHCl}_3$ ).

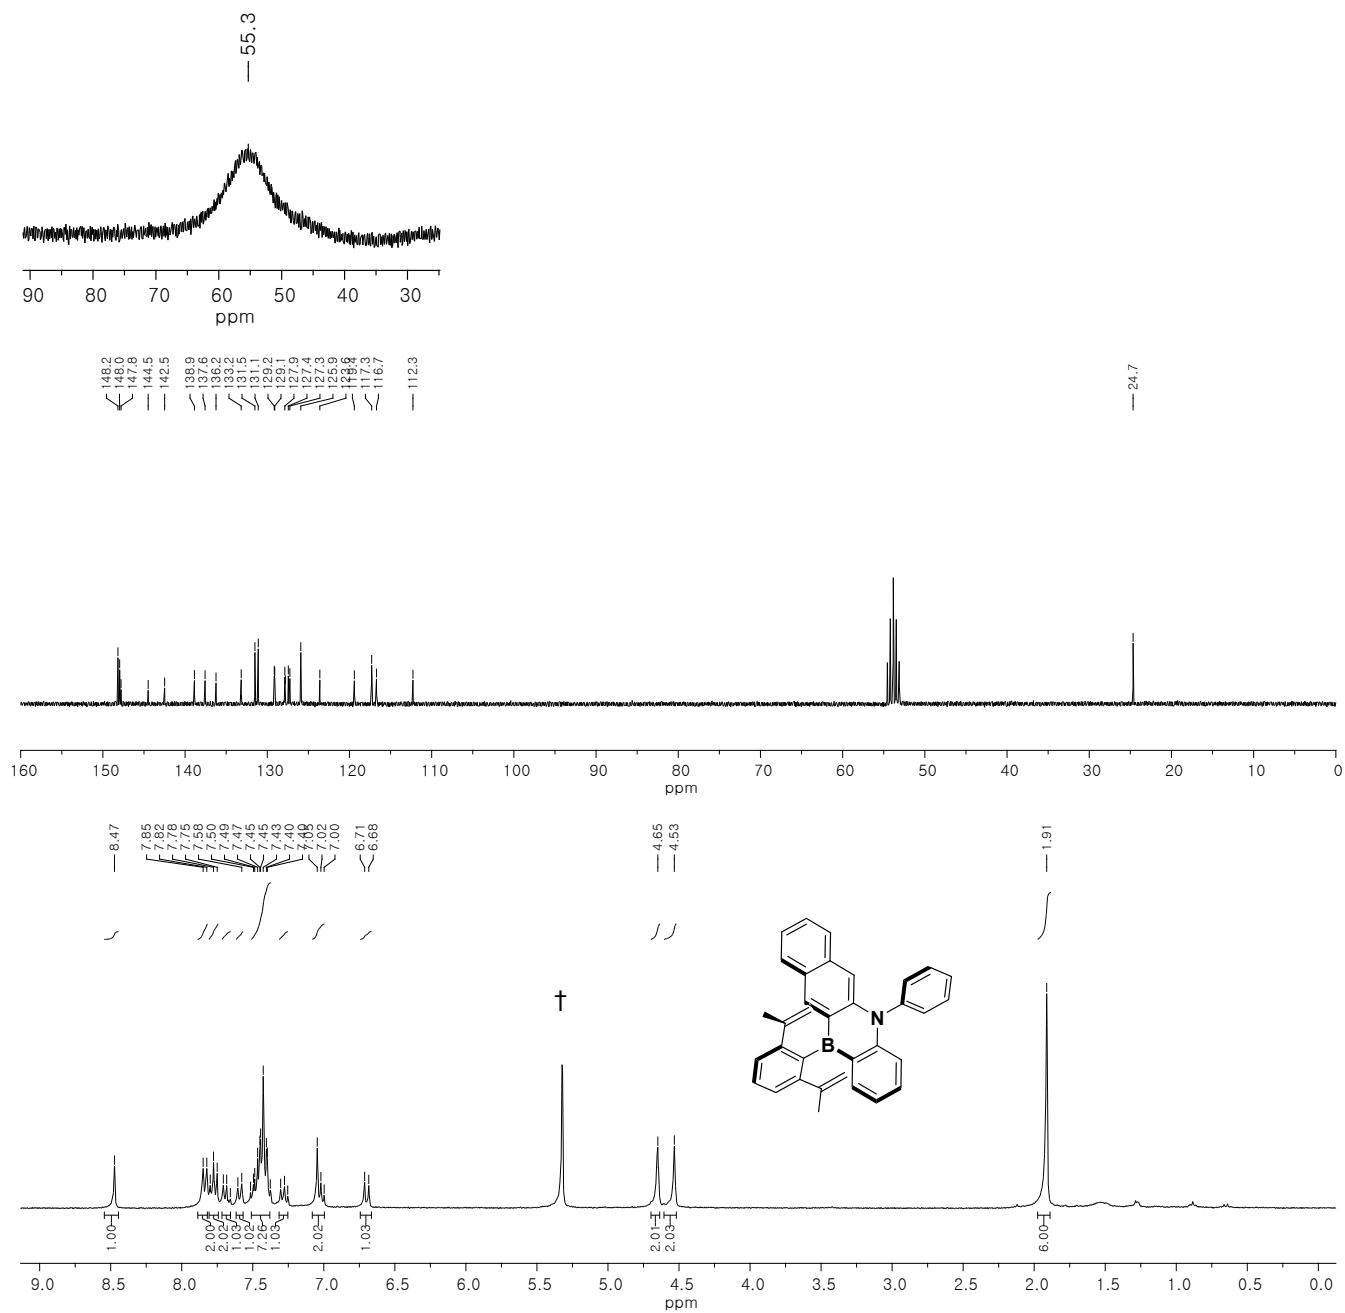

**Fig. S18.** <sup>1</sup>H (bottom), <sup>13</sup>C (middle), and <sup>11</sup>B (top) NMR spectra of **1d** in CD<sub>2</sub>Cl<sub>2</sub> († from residual CHDCl<sub>2</sub>).

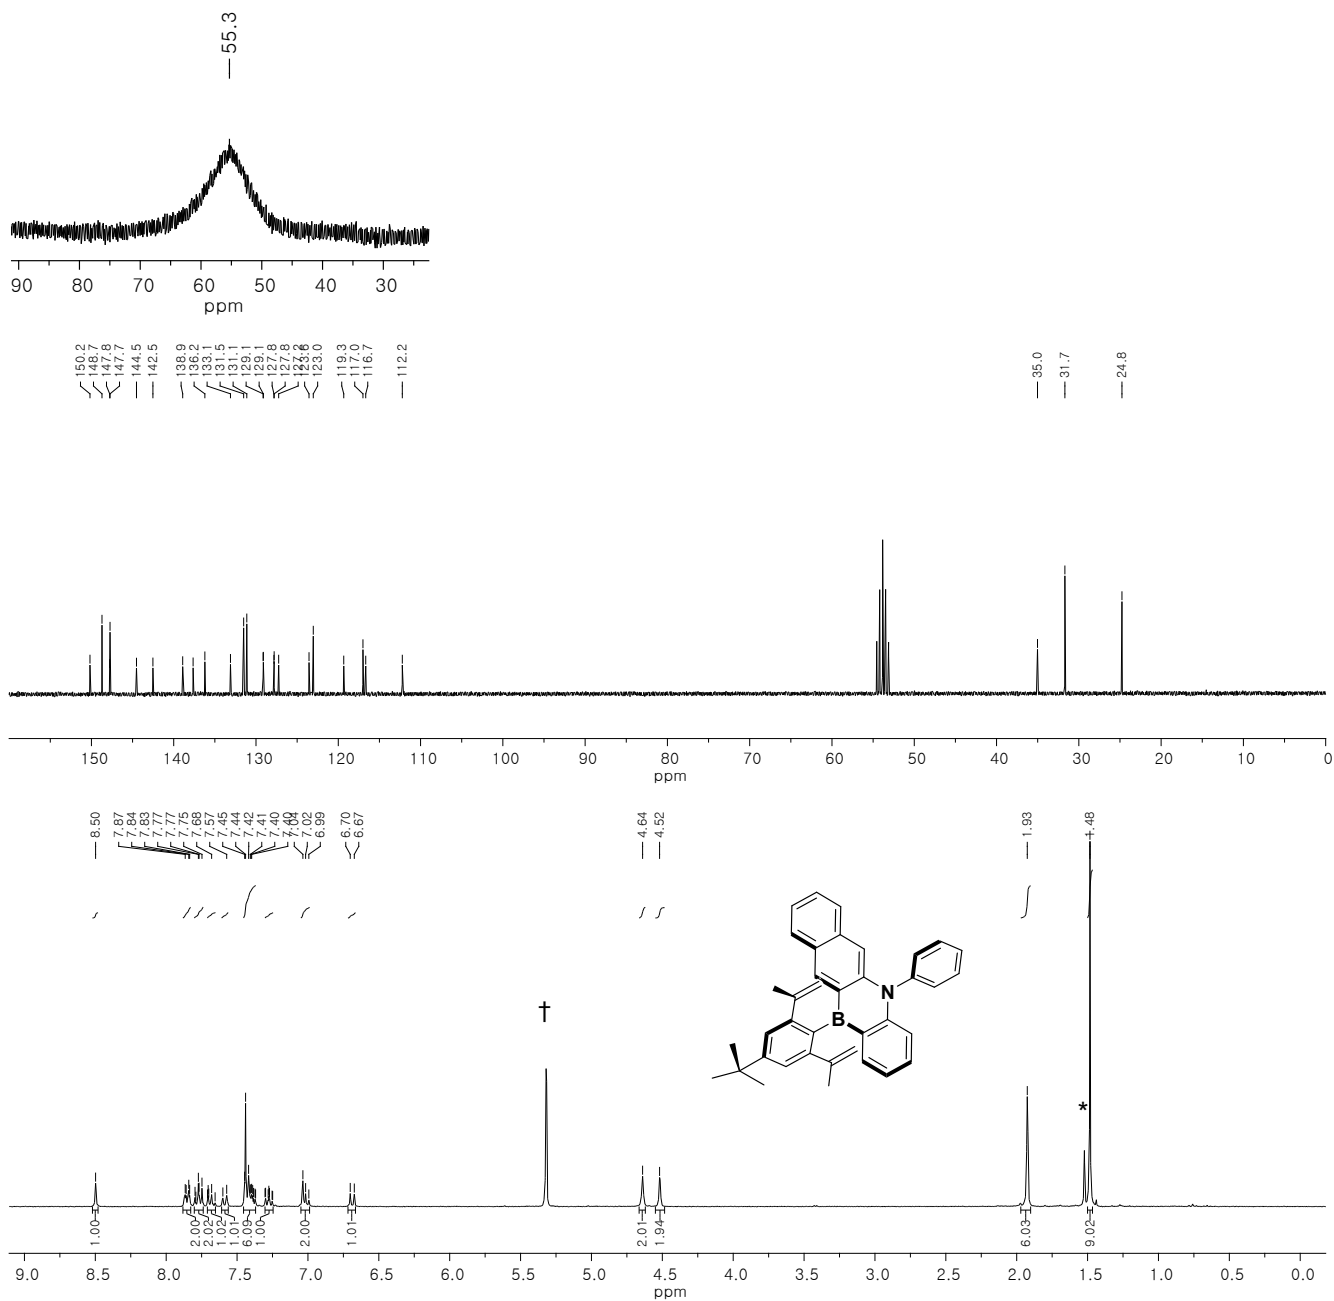

**Fig. S19.**  $^1H$  (bottom),  $^{13}C$  (middle), and  $^{11}B$  (top) NMR spectra of **2d** in  $CD_2Cl_2$  (\* from water and † from residual  $CH_2Cl_2$ ).

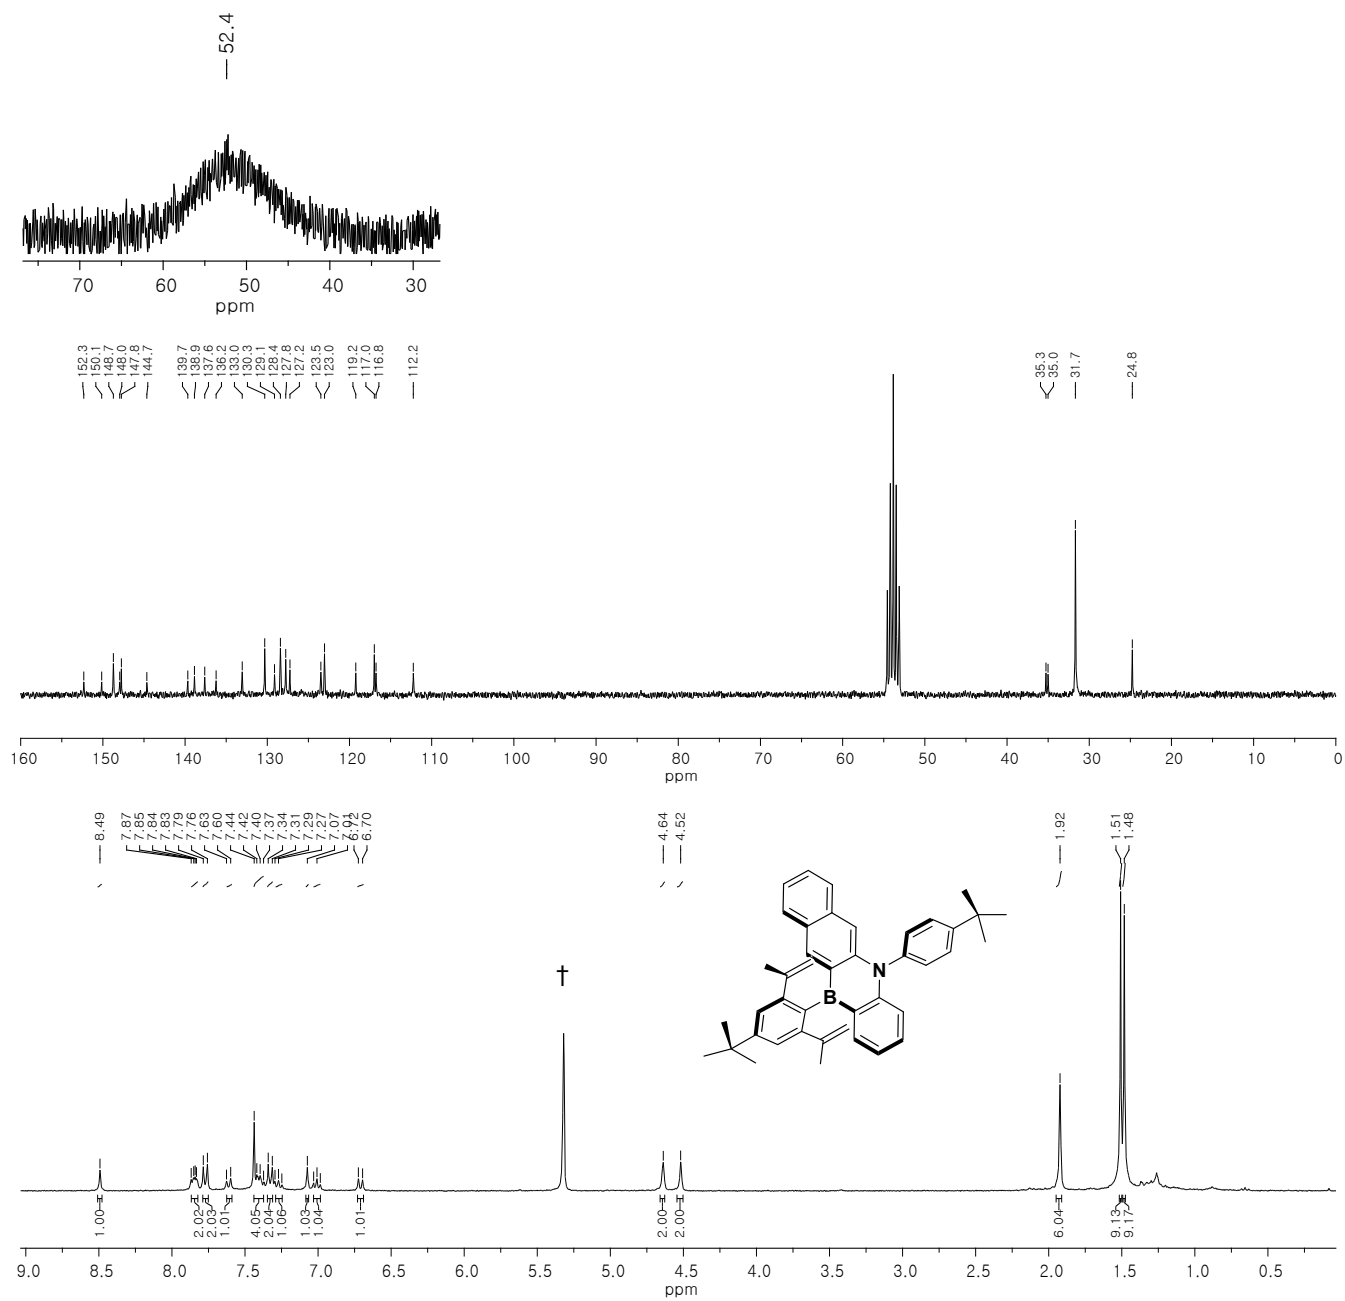

**Fig. S20.** <sup>1</sup>H (bottom), <sup>13</sup>C (middle), and <sup>11</sup>B (top) NMR spectra of **3d** in CD<sub>2</sub>Cl<sub>2</sub> († from residual CH<sub>2</sub>Cl<sub>2</sub>).

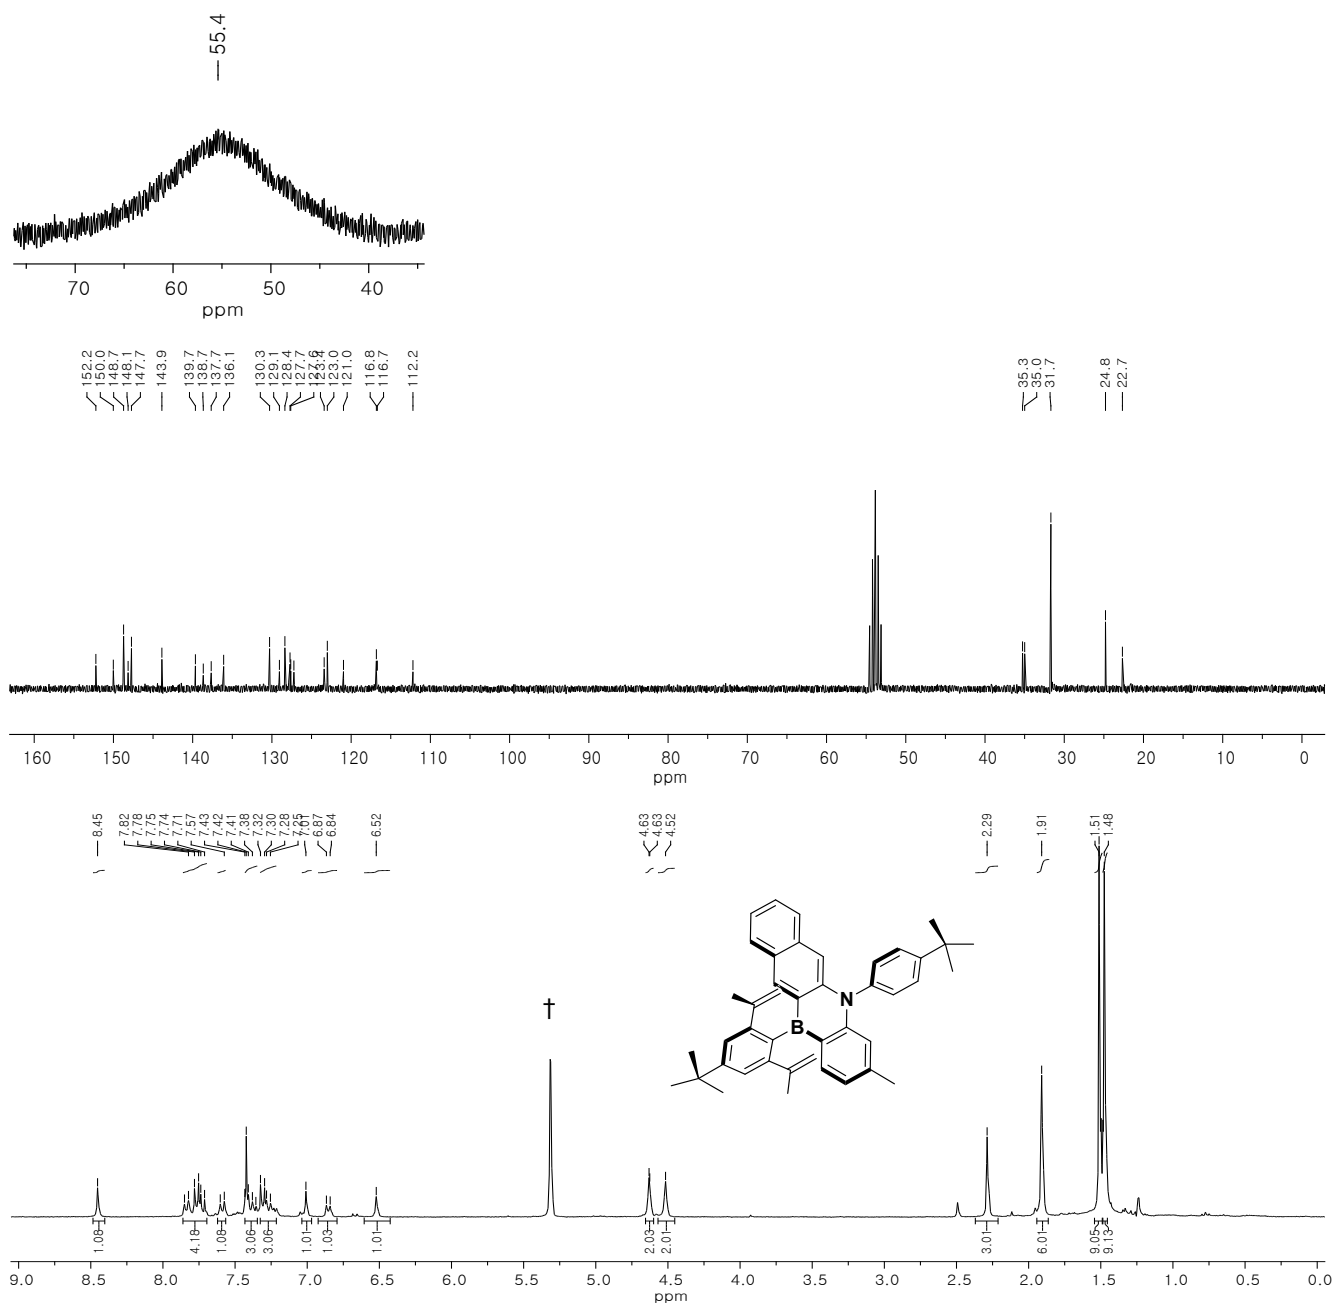

**Fig. S21.** <sup>1</sup>H (bottom), <sup>13</sup>C (middle), and <sup>11</sup>B (top) NMR spectra of **4d** in CD<sub>2</sub>Cl<sub>2</sub> († from residual CHDCl<sub>2</sub>).



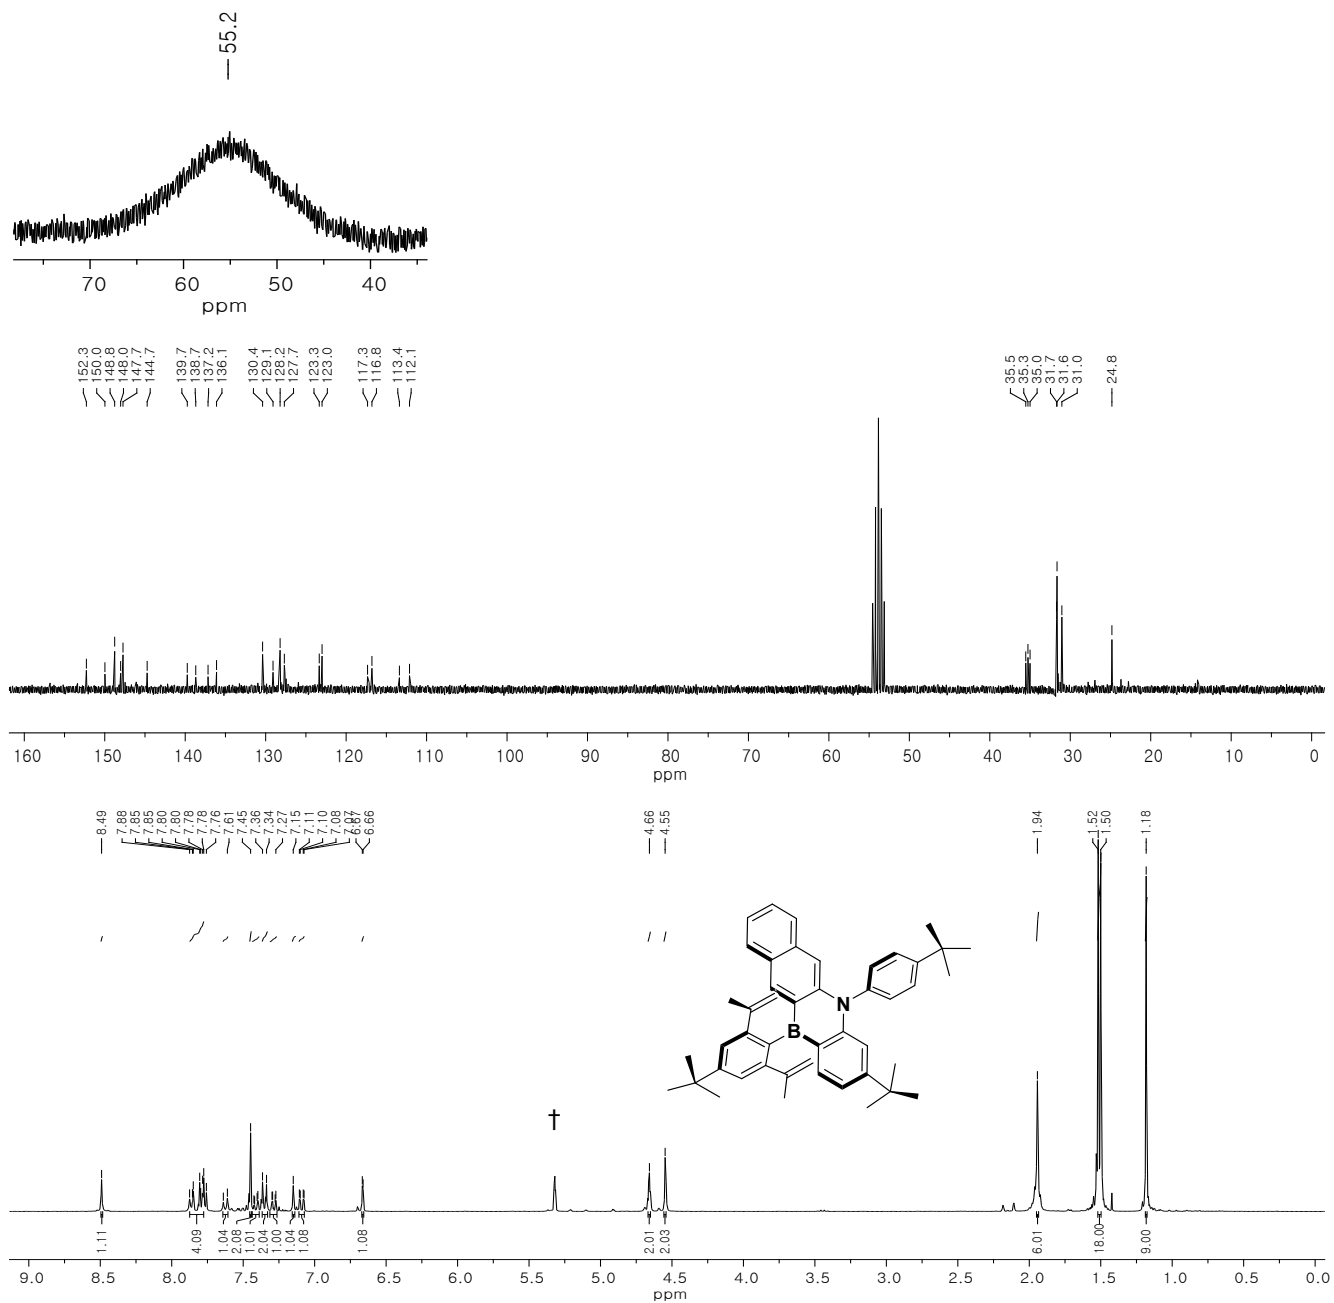

**Fig. S22.**  $^1\text{H}$  (bottom),  $^{13}\text{C}$  (middle), and  $^{11}\text{B}$  (top) NMR spectra of **5d** in  $\text{CD}_2\text{Cl}_2$  († from residual  $\text{CHDCl}_2$ ).

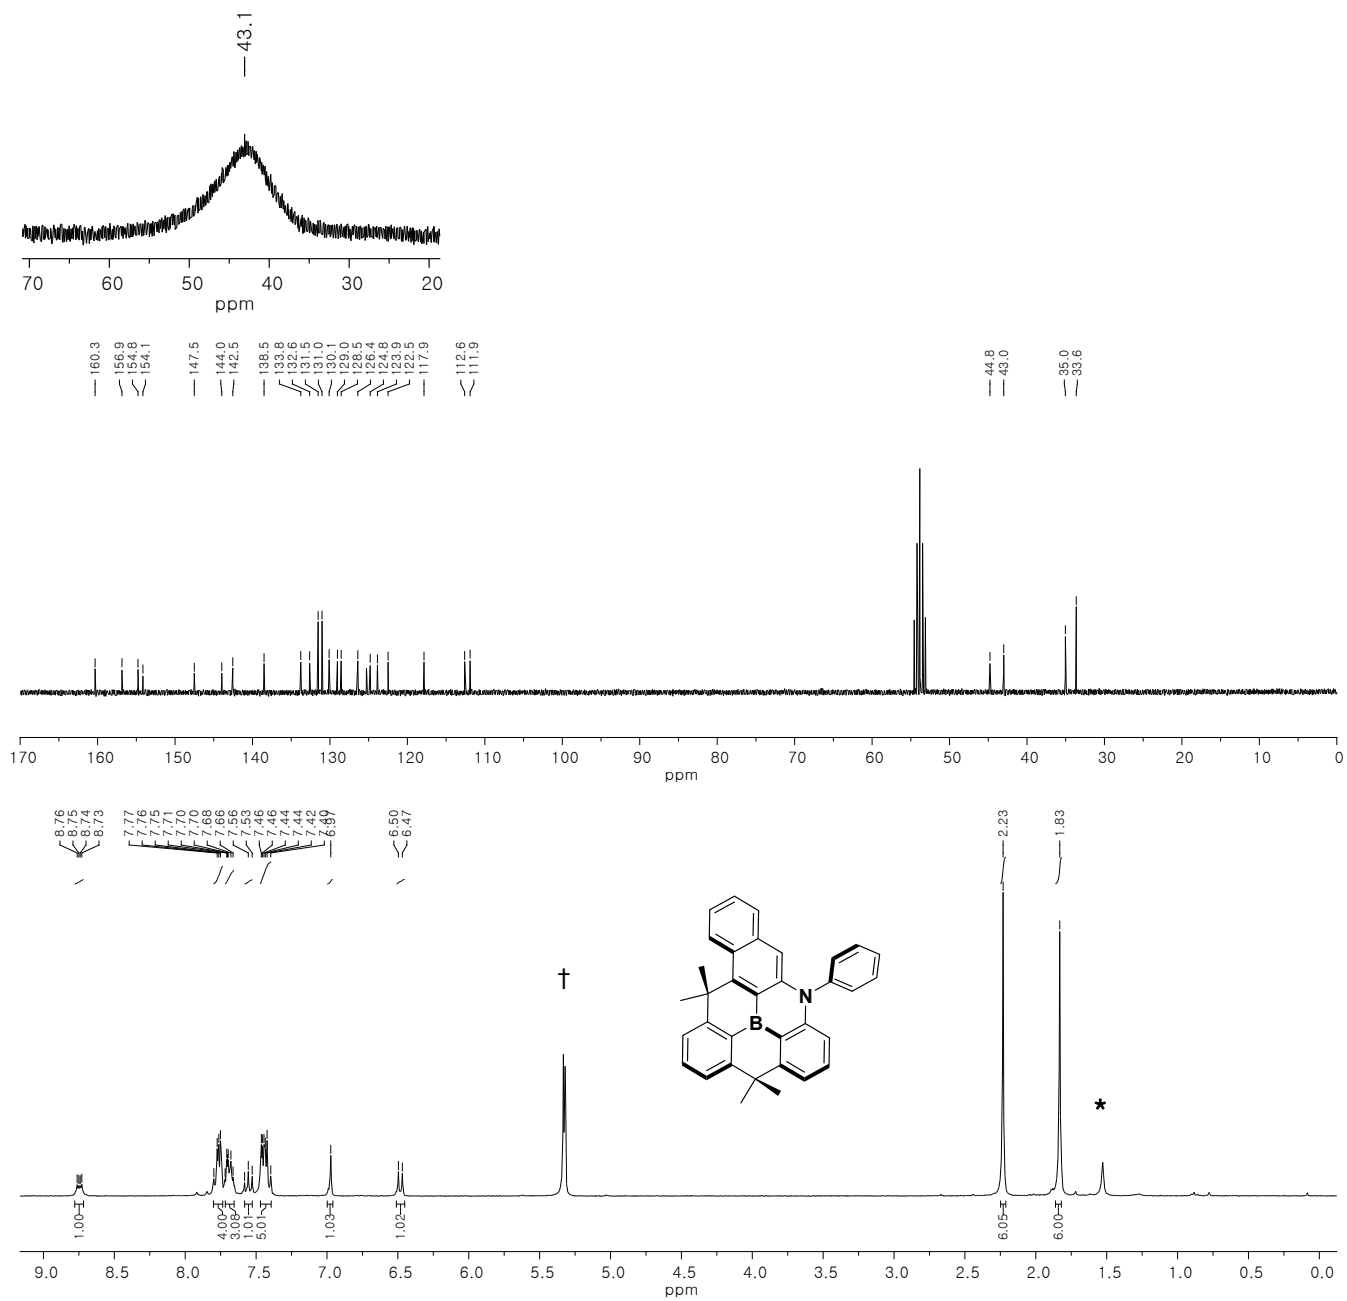

**Fig. S23.** <sup>1</sup>H (bottom), <sup>13</sup>C (middle), and <sup>11</sup>B (top) NMR spectra of **1** in CD<sub>2</sub>Cl<sub>2</sub> (\* from water and † from residual CHDCl<sub>2</sub>).

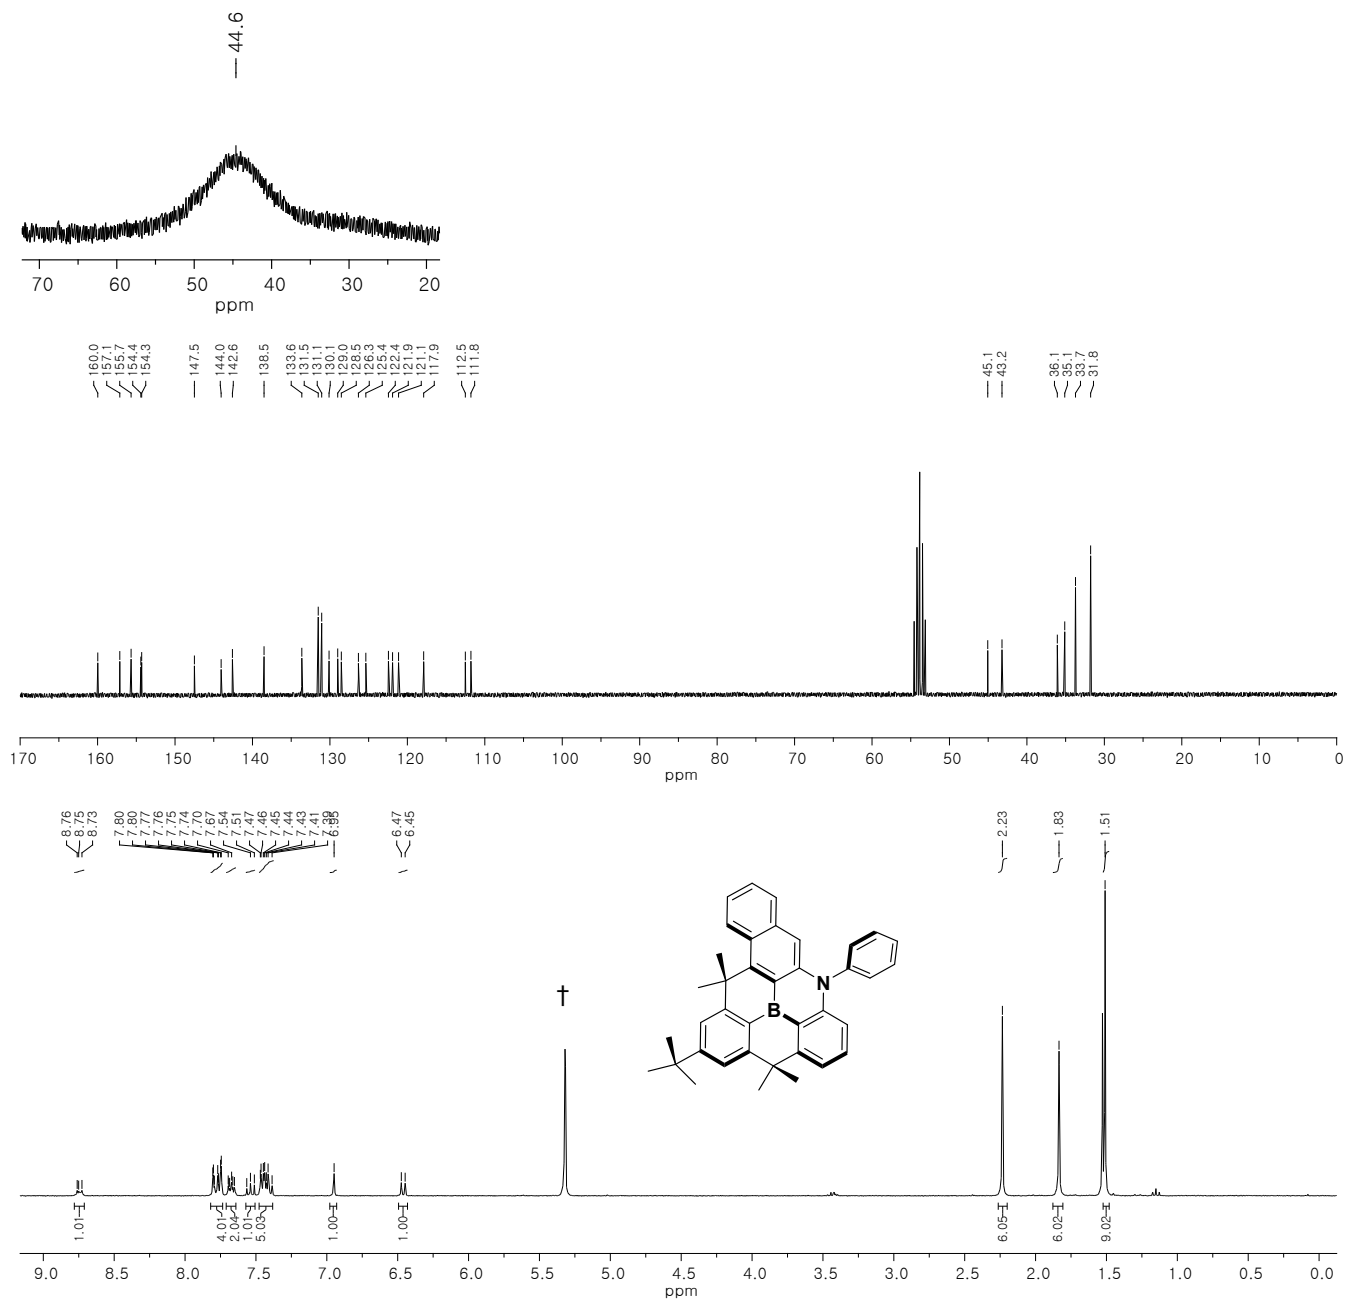

**Fig. S24.**  $^1\text{H}$  (bottom),  $^{13}\text{C}$  (middle), and  $^{11}\text{B}$  (top) NMR spectra of **2** in  $\text{CD}_2\text{Cl}_2$  ( $\dagger$  from residual  $\text{CHDCl}_2$ ).

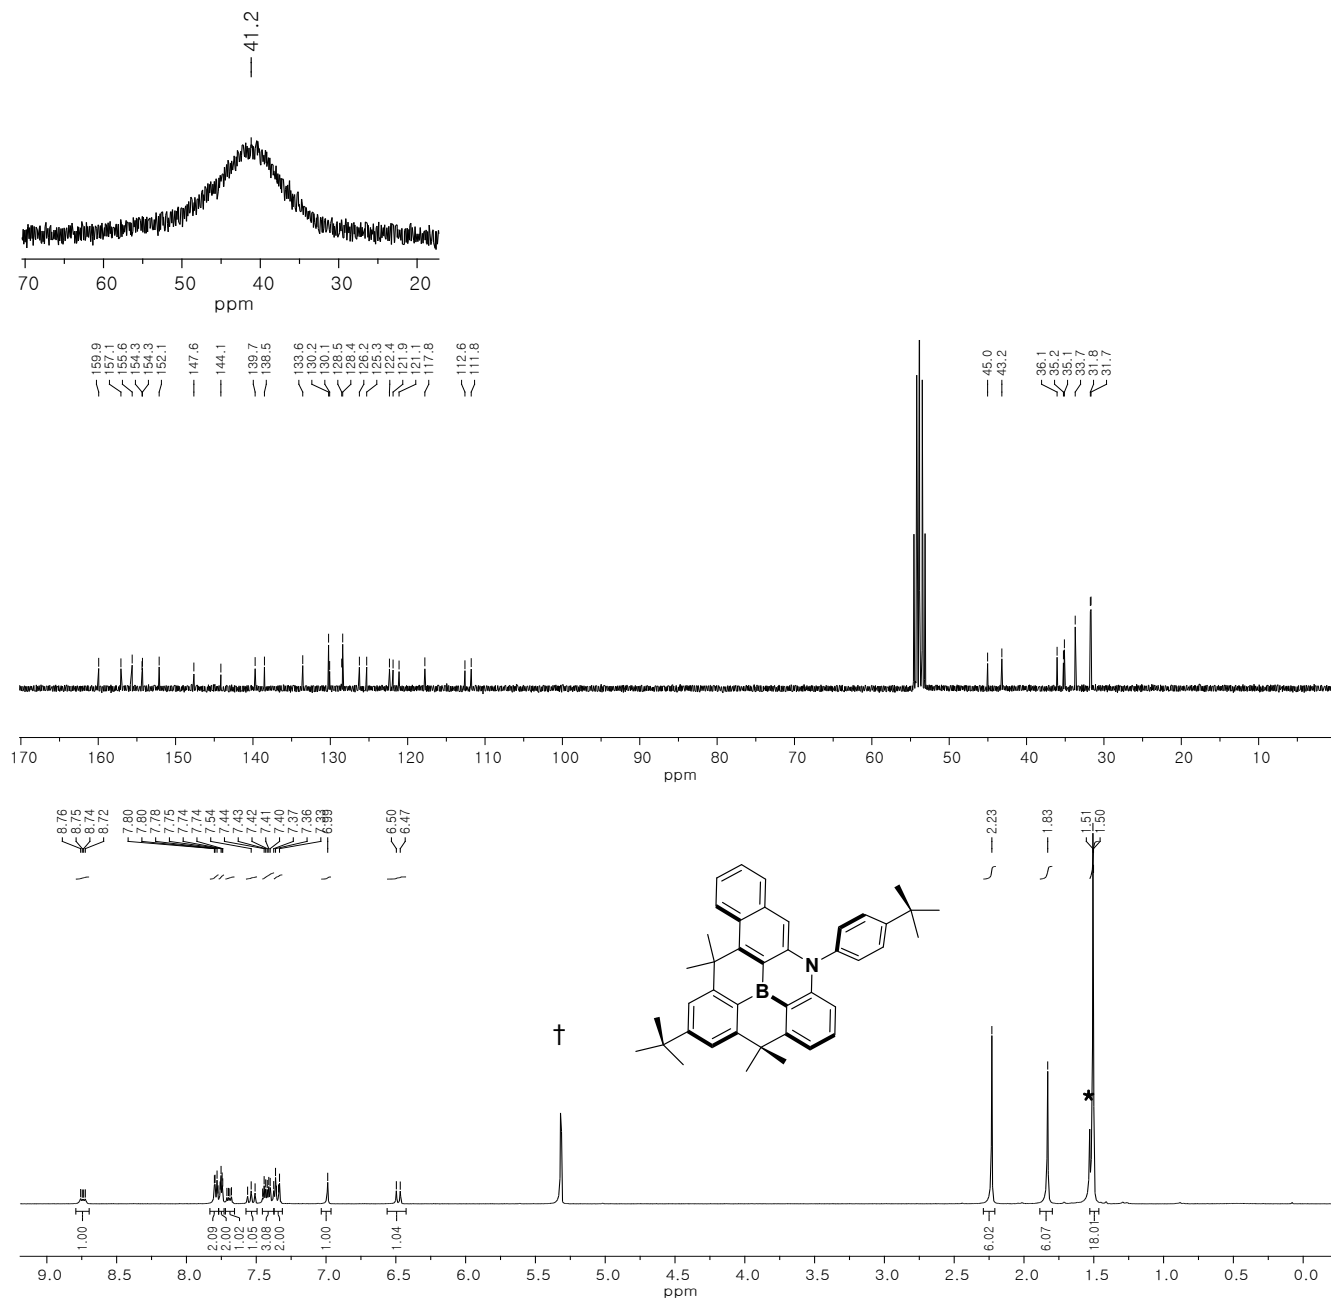

**Fig. S25.**  $^1\text{H}$  (bottom),  $^{13}\text{C}$  (middle), and  $^{11}\text{B}$  (top) NMR spectra of **3** in  $\text{CD}_2\text{Cl}_2$  (\* from water and † from residual  $\text{CHDCl}_2$ ).

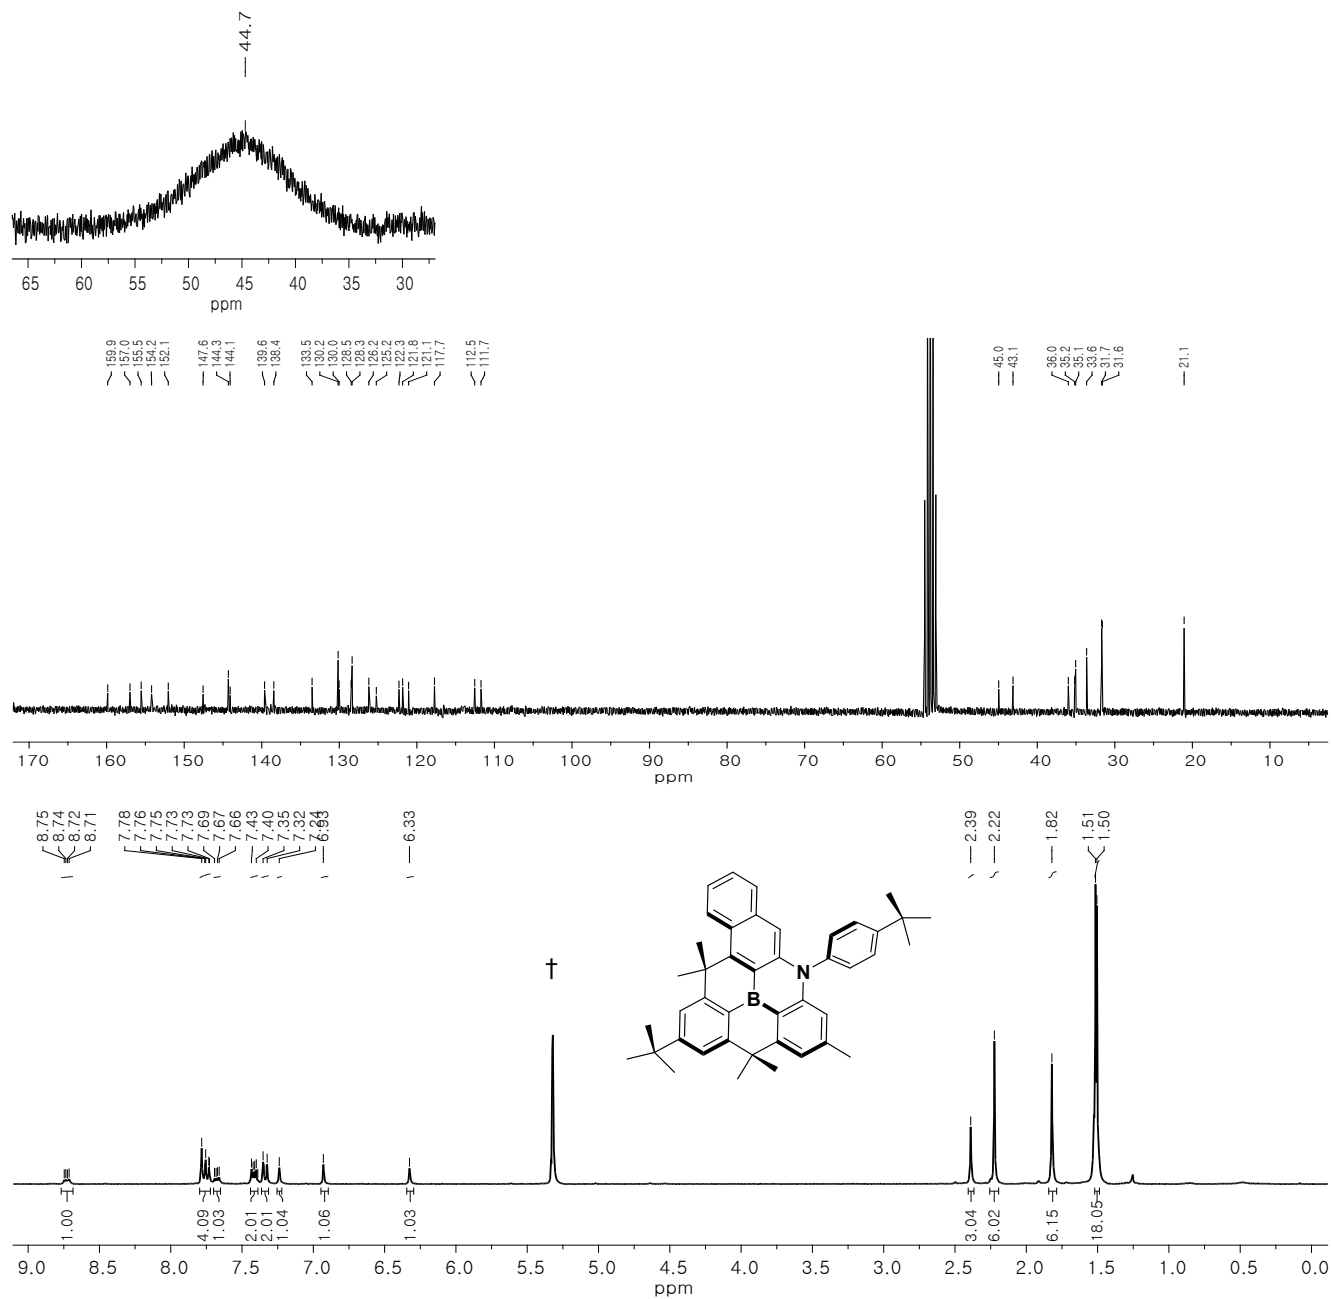

**Fig. S26.**  $^1\text{H}$  (bottom),  $^{13}\text{C}$  (middle), and  $^{11}\text{B}$  (top) NMR spectra of **4** in  $\text{CD}_2\text{Cl}_2$  ( $\dagger$  from residual  $\text{CH}_2\text{Cl}_2$ ).

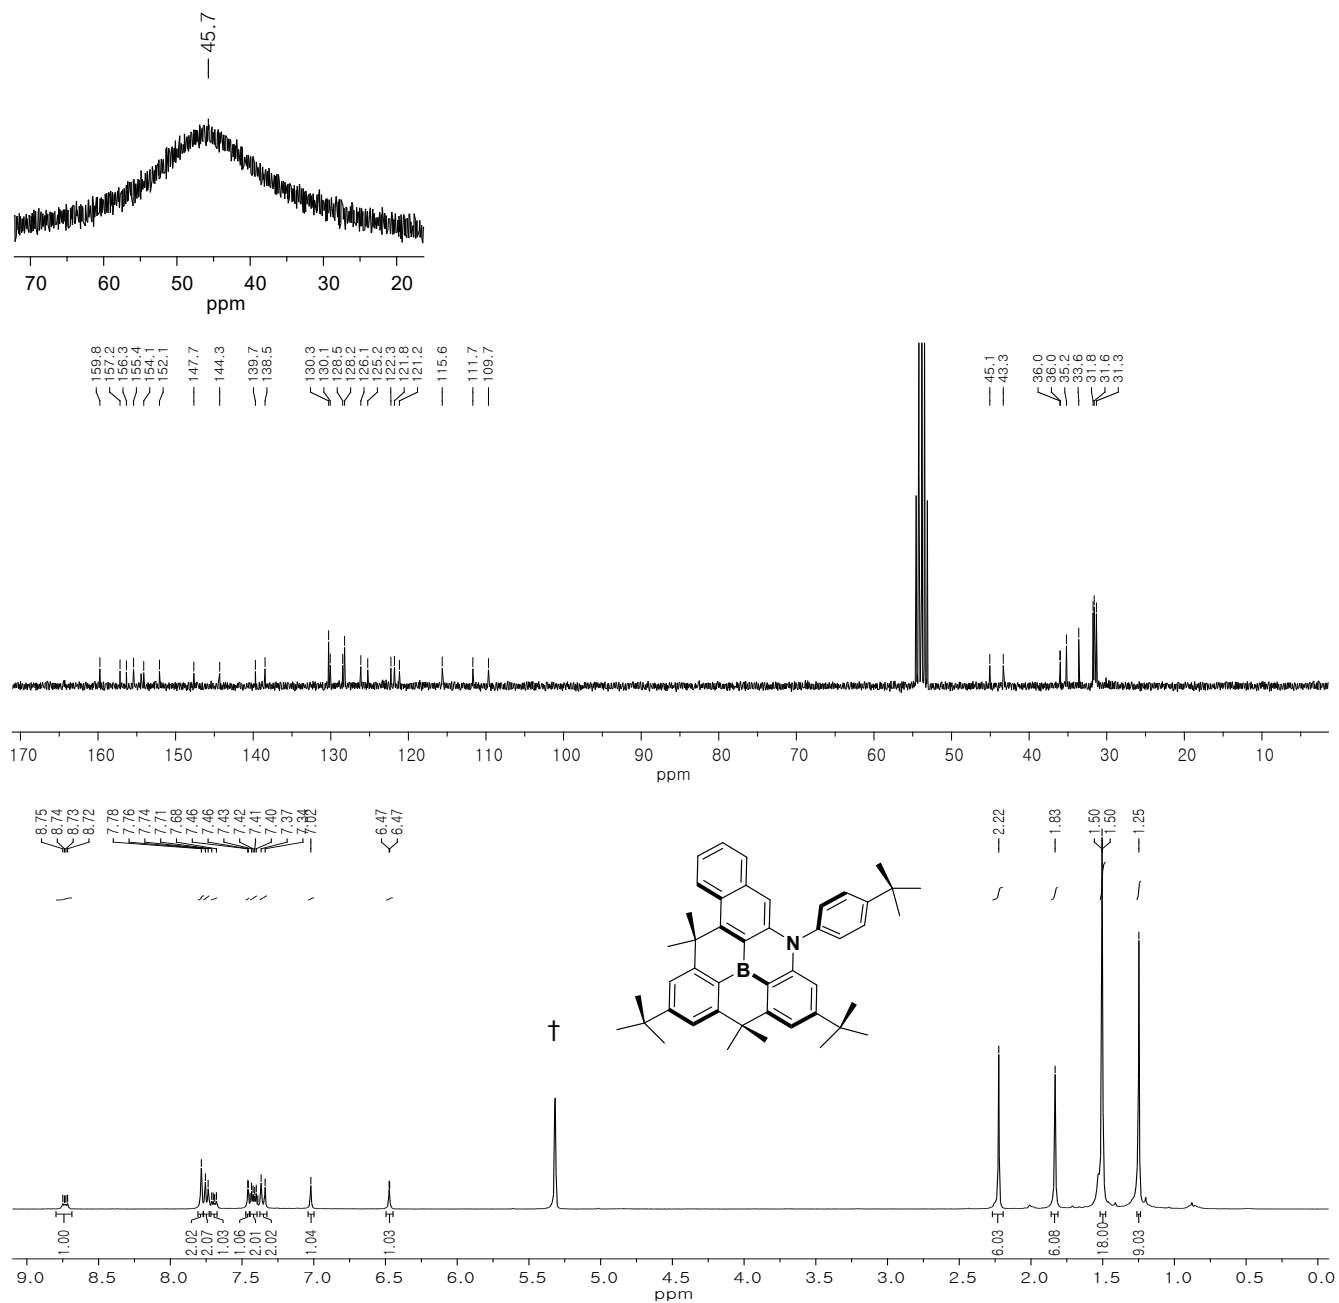

**Fig. S27.**  $^1\text{H}$  (bottom),  $^{13}\text{C}$  (middle), and  $^{11}\text{B}$  (top) NMR spectra of **5** in  $\text{CD}_2\text{Cl}_2$  († from residual  $\text{CHDCl}_2$ ).

## References

1. Adamo, C.; Barone, V. *J. Chem. Phys.* **1999**, *110*, 6158.
2. Frisch, M. J.; Trucks, G. W.; Schlegel, H. B.; Scuseria, G. E.; Robb, M. A.; Cheeseman, J. R.; Scalmani, G.; Barone, V.; Petersson, G. A.; Nakatsuji, H.; Li, X.; Caricato, M.; Marenich, A. V.; Bloino, J.; Janesko, B. G.; Gomperts, R.; Mennucci, B.; Hratchian, H. P.; Ortiz, J. V.; Izmaylov, A. F.; Sonnenberg, J. L.; Williams-Young, D.; Ding, F.; Lipparini, F.; Egidi, F.; Goings, J.; Peng, B.; Petrone, A.; Henderson, T.; Ranasinghe, D.; Zakrzewski, V. G.; Gao, J.; Rega, N.; Zheng, G.; Liang, W.; Hada, M.; Ehara, M.; Toyota, K.; Fukuda, R.; Hasegawa, J.; Ishida, M.; Nakajima, T.; Honda, Y.; Kitao, O.; Nakai, H.; Vreven, T.; Throssell, K.; Montgomery Jr., J. A.; Peralta, J. E.; Ogliaro, F.; Bearpark, M. J.; Heyd, J. J.; Brothers, E. N.; Kudin, K. N.; Staroverov, V. N.; Keith, T. A.; Kobayashi, R.; Normand, J.; Raghavachari, K.; Rendell, A. P.; Burant, J. C.; Iyengar, S. S.; Tomasi, J.; Cossi, M.; Millam, J. M.; Klene, M.; Adamo, C.; Cammi, R.; Ochterski, J. W.; Martin, R. L.; Morokuma, K.; Farkas, O.; Foresman, J. B.; Fox, D. J. *Gaussian 16, Revision A.03*, Gaussian, Inc., Wallingford CT, 2016.
3. Martin, R. L. *J. Chem. Phys.* **2003**, *118*, 4775-4777.
4. Tomasi, J.; Mennucci, B.; Cammi, R. *Chem. Rev.* **2005**, *105*, 2999.
5. Chen, Z.; Wannere, C. S.; Corminboeuf, C.; Puchta, R.; Schleyer, P. v. R. *Chem. Rev.* **2005**, *105*, 3842-3888.
6. Schleyer, P. v. R.; Manoharan, M.; Wang, Z.-X.; Kiran, B.; Jiao, H.; Puchta, R.; Hommes, N. J. R. v. E. *Org. Lett.* **2001**, *3*, 2465-2468.
7. Lu, T.; Chen, F. *J. Comput. Chem.* **2012**, *33*, 580-592.
